# Supplementary material for: Simple Structural Differences between Coding and Noncoding DNA
Source: PLoS One. 2011 Feb 3;6(2):e14651. doi: 10.1371/journal.pone.0014651 (PMC3033402; doi:10.1371/journal.pone.0014651)
Supplement: Table S1 — This table list those microbes used for analysis in this study. Results for rank-sum tests and average calculation of Morisita's Index of aggregation are presented in following columns (N = noncoding, C = coding, Pur = purine, Pyr = pyrimidine). (0.18 MB XLS) [file pone.0014651.s001.xls]

## Sheet: Sheet1
GC content	Coding length	Noncoding length	% coding	length	length	species	group	Purine rank-sum value	Purine z-value	Purine p, alpha = 0.05	Purines differ between coding and noncoding regions	Pyrimidine rank-sum value	Pyrimidine z-value	Pyrimidine p, alpha = 0.05	Pyrimidines differ between coding and noncoding regions	PYR Cod	PYR Non	R-PYR cod	Greater than n simulations	R-PYR Non	Greater than n simulations	PUR Cod	PUR Non	R-PUR Cod	Greater than N simulations	R-PUR Non	Greater than N simulations	PYR N > C	PUR N > C	PYR C > 100	PYR N > 100	PUR C > 100	PUR N > 100	10x10	20x5	20x20	40x10
47	9003113	962527	0.903415	9965640	9965640	Candidatus_Solibacter_usitatus_Ellin6076_complete_genome	Acidobacteria	565936374	32.184	2.95357e-227	Y	566084816	32.2394	4.96032e-228	Y	0.908776	0.926515	0.918628	0	0.919497	100	0.908694	0.926754	0.918673	0	0.919513	100	Y	Y	N	Y	N	Y
53.1	5047050	603318	0.893225	5650368	5650368	Candidatus_Koribacter_versatilis_Ellin345_complete_genome	Acidobacteria	212676236	35.2705	1.66661e-272	Y	2.13057e+08	35.5883	2.12571e-277	Y	0.912153	0.939007	0.918677	0	0.919642	100	0.912028	0.938435	0.918602	0	0.91976	100	Y	Y	N	Y	N	Y
31.9	3544594	582762	0.858805	4127356	4127356	Acidobacterium_capsulatum_ATCC_51196_complete_genome	Acidobacteria	1.50003e+08	35.3029	5.30127e-273	Y	149893881	35.1732	5.14389e-271	Y	0.911352	0.939042	0.918621	0	0.919478	100	0.911179	0.938751	0.918625	0	0.919471	100	Y	Y	N	Y	N	Y
68.3	3399845	342931	0.908375	3742776	3742776	Xylanimonas_cellulosilytica_DSM_15894_complete_genome	Actinobacteria	7.57514e+07	19.206	3.29654e-82	Y	75790828	19.2714	9.33618e-83	Y	0.894505	0.910758	0.918678	0	0.918831	0	0.894537	0.909743	0.918703	0	0.918749	0	Y	Y	N	N	N	N
67.1	2717502	447536	0.8586	3165038	3165038	Slackia_heliotrinireducens_DSM_20476_complete_genome	Actinobacteria	8.80469e+07	30.4192	3.05936e-203	Y	87929422	30.2118	1.65535e-200	Y	0.907169	0.933425	0.918707	0	0.919369	100	0.907022	0.933261	0.918656	0	0.919403	100	Y	Y	N	Y	N	Y
58.8	6955269	1257536	0.846881	8212805	8212805	Saccharopolyspora_erythraea_NRRL2338_complete_genome	Actinobacteria	6.12783e+08	39.4034	0	Y	614035611	39.9154	0	Y	0.893398	0.910563	0.918687	0	0.918681	0	0.893389	0.910562	0.918717	0	0.918814	0	Y	Y	N	N	N	N
60.5	7105071	699694	0.91035	7804765	7804765	Rhodococcus_jostii_RHA1_complete_genome	Actinobacteria	3.26896e+08	29.9711	2.33818e-197	Y	327201959	30.1411	1.40404e-199	Y	0.900527	0.918593	0.918729	0	0.918892	30	0.900525	0.91874	0.918692	0	0.918956	36	Y	Y	N	N	N	N
66.1	5951748	564562	0.913362	6516310	6516310	Rhodococcus_erythropolis_PR4_DNA_complete_genome	Actinobacteria	2.18983e+08	25.9574	1.5011e-148	Y	2.19055e+08	26.0103	3.7847e-149	Y	0.901786	0.919195	0.918681	0	0.918613	81	0.901848	0.919532	0.918676	0	0.918608	92	Y	Y	N	N	N	N
39	2383241	314299	0.883487	2697540	2697540	Kocuria rhizophila DC2201	Actinobacteria	4.86206e+07	15.2166	2.7462e-52	Y	48535862	15.01	6.31375e-51	Y	0.903936	0.916771	0.918697	0	0.9184	1	0.903795	0.917385	0.918582	0	0.918979	4	Y	Y	N	N	N	N
41.3	4311882	449301	0.905632	4761183	4761183	Kineococcus radiotolerans SRS30216	Actinobacteria	1.23091e+08	18.399	1.33827e-75	Y	1.22698e+08	17.951	4.7175e-72	Y	0.90655	0.920015	0.918725	0	0.91964	68	0.906636	0.920014	0.918682	0	0.919244	88	Y	Y	N	N	N	N
73.7	2468195	281451	0.897641	2749646	2749646	Jonesia_denitrificans_DSM_20603_complete_genome	Actinobacteria	44243861	13.9301	4.15596e-44	Y	44288461	14.0419	8.63214e-45	Y	0.911691	0.92628	0.918667	0	0.919007	100	0.911767	0.92582	0.918707	0	0.918914	100	Y	Y	N	Y	N	Y
56.3	6464468	1033466	0.862167	7497934	7497934	Frankia_alni_str_ACN14A_chromosome_complete_sequence	Actinobacteria	4.39121e+08	25.3081	2.60413e-141	Y	4.38746e+08	25.1244	2.68914e-139	Y	0.896687	0.908809	0.918698	0	0.919234	0	0.896727	0.909269	0.918688	0	0.919311	0	Y	Y	N	N	N	N
60	3153062	479198	0.868072	3632260	3632260	Eggerthella_lenta_DSM_2243_complete_genome	Actinobacteria	113477594	39.1434	0	Y	1.13494e+08	39.1678	0	Y	0.909434	0.943038	0.918697	0	0.919878	100	0.909612	0.944505	0.918693	0	0.919995	100	Y	Y	N	Y	N	Y
59	2898479	360166	0.889474	3258645	3940880	Clavibacter_michiganensis subsp sepedonicus	Actinobacteria	67351993	16.3062	8.91418e-60	Y	66822628	15.3119	6.37147e-53	Y	0.901939	0.914788	0.91867	0	0.918735	0	0.901914	0.915282	0.918769	0	0.918581	0	Y	Y	N	N	N	N
57	2052002	323790	0.863713	2375792	2375792	Bifidobacterium_longum_DJO10A_complete_genome	Actinobacteria	48441992	27.5474	4.74826e-167	Y	4.83358e+07	27.2547	1.46067e-163	Y	0.900019	0.926996	0.918718	0	0.91917	100	0.90001	0.927023	0.918713	0	0.919113	100	Y	Y	N	Y	N	Y
57	1632636	301059	0.844309	1933695	1933695	Bifidobacterium animalis subsp lactis AD011	Actinobacteria	35446542	22.5457	1.4784e-112	Y	3.5438e+07	22.5155	2.92291e-112	Y	0.900539	0.92548	0.918667	0	0.919364	100	0.900586	0.924408	0.918709	0	0.919241	100	Y	Y	N	Y	N	Y	y	y	y	y
54.7	1380255	163550	0.89406	1543805	1543805	Atopobium_parvulum_DSM_20469_complete_genome	Actinobacteria	1.47591e+07	12.5509	3.9311e-36	Y	1.46958e+07	12.1799	3.97954e-34	Y	0.925225	0.943292	0.918728	100	0.919181	100	0.92514	0.943792	0.918618	100	0.919471	100	Y	Y	Y	Y	Y	Y
36.8	4049143	548543	0.880692	4597686	4597686	Arthrobacter aurescens TC1	Actinobacteria	1.42421e+08	17.7015	4.07956e-70	Y	142799178	18.1118	2.57163e-73	Y	0.910324	0.923471	0.918674	0	0.918982	100	0.910374	0.9231	0.918695	0	0.918922	100	Y	Y	N	Y	N	Y	y	y	y	y
41.4	7180556	1067588	0.870566	8248144	8248144	Actinosynnema_mirum_DSM_43827_complete_genome	Actinobacteria	5.49665e+08	47.6722	0	Y	549533740	47.6148	0	Y	0.894613	0.918507	0.918693	0	0.91929	5	0.894371	0.918555	0.918687	100	0.919407	5	Y	Y	N	N	N	N
35.6	1916563	241594	0.888055	2158157	2158157	Acidimicrobium_ferrooxidans_DSM_1033_complete_genome	Actinobacteria	2.99548e+07	13.5032	1.49752e-41	Y	2.99826e+07	13.5994	4.03581e-42	Y	0.899954	0.914309	0.918732	0	0.919469	0	0.899883	0.914746	0.918683	0	0.919484	0	Y	Y	N	N	N	N
74.7	1761876	294540	0.85677	2056416	2056416	Zymomonas_mobilis_subsp_mobilis_ZM4	Alphaproteobacteria	3.69329e+07	22.3098	2.96593e-110	Y	3.7083e+07	22.8131	3.39936e-115	Y	0.932428	0.962014	0.918783	100	0.91972	100	0.932313	0.960995	0.918613	100	0.919765	100	Y	Y	Y	Y	Y	Y
49.8	1827462	297309	0.860075	2124771	2124771	Zymomonas_mobilis_subsp_mobilis_NCIB_11163_complete_genome	Alphaproteobacteria	40423951	28.4979	1.24432e-178	Y	4.02659e+07	27.9883	2.25507e-172	Y	0.930793	0.966336	0.918625	100	0.919475	100	0.9308	0.967256	0.918757	100	0.919735	100	Y	Y	Y	Y	Y	Y
43.3	1014642	253140	0.800328	1267782	1267782	Wolbachia_endosymbiont_Drosophila_melanogaster	Alphaproteobacteria	1.5344e+07	-4.25	2.13768e-05	Y	1.55186e+07	-3.18993	0.00142305	Y	0.938537	0.934641	0.918781	100	0.919221	100	0.938585	0.932403	0.918811	100	0.919199	100	N	N	Y	Y	Y	Y
48.6	1122686	174961	0.865171	1297647		Rhodobacter_sphaeroides_KD131_chromosome_2_complete_sequence	Alphaproteobacteria	13465000	14.5356	7.2036e-48	Y	13509000	14.8333	8.9197e-50	Y	0.912154	0.932904	0.918716	0	0.919569	100	0.912222	0.931441	0.918675	0	0.91943	100	Y	Y	N	Y	N	Y
27	2798538	354254	0.887638	3152792		Rhodobacter_sphaeroides_KD131_chromosome_1_complete_sequence	Alphaproteobacteria	71204000	30.1134	3.2357e-199	Y	71178060	30.0635	1.4528e-198	Y	0.914042	0.944614	0.918687	0	0.919915	100	0.914266	0.944362	0.918708	0	0.919826	100	Y	Y	N	Y	N	Y
62.4	1684831	211080	0.888666	1895911		Ochrobactrum_anthropi_ATCC_49188_chromosome_2_complete_sequence	Alphaproteobacteria	23773000	15.9149	4.9975e-57	Y	23710000	15.6471	3.4763e-55	Y	0.913874	0.933538	0.918657	0	0.919626	100	0.913683	0.933887	0.918668	0	0.919839	100	Y	Y	N	Y	N	Y
45.7	2484959	402338	0.860652	2887297		Ochrobactrum_anthropi_ATCC_49188_chromosome_1_complete_sequence	Alphaproteobacteria	69016000	22.3031	3.4489e-110	Y	69181180	22.6394	1.7755e-113	Y	0.914262	0.93581	0.918744	0	0.919502	100	0.914236	0.934713	0.918595	0	0.91929	100	Y	Y	N	Y	N	Y
26.8	6237061	1421994	0.814338	7659055	7659055	Methylobacterium_sp_4-46_complete_genome	Alphaproteobacteria	5.82694e+08	16.0471	5.98539e-58	Y	5.81967e+08	15.7413	7.87747e-56	Y	0.910077	0.917336	0.918709	0	0.918895	0	0.910217	0.917423	0.918663	0	0.919004	0	Y	Y	N	N	N	N
67.9	6317513	1454947	0.812807	7772460	7772460	Methylobacterium_nodulans_ORS_2060_complete_genome	Alphaproteobacteria	6.33773e+08	28.0183	9.73288e-173	Y	633396009	27.8639	7.31858e-171	Y	0.909701	0.923288	0.918655	0	0.918951	100	0.90968	0.923228	0.918698	0	0.918929	100	Y	Y	N	Y	N	Y
35.4	3911836	406141	0.905942	4317977	4317977	Jannaschia sp CCS1	Alphaproteobacteria	103658808	21.1385	3.52028e-99	Y	104231207	21.8956	2.86112e-106	Y	0.90872	0.927204	0.91877	0	0.919638	100	0.90895	0.926926	0.918617	0	0.91979	100	Y	Y	N	Y	N	Y
38.2	3342843	362178	0.902247	3705021	3705021	Hyphomonas neptunium ATCC 15444	Alphaproteobacteria	8.25063e+07	25.2359	1.61869e-140	Y	82329162	24.9462	2.35011e-137	Y	0.91416	0.938223	0.918667	0	0.919392	100	0.914437	0.938446	0.918705	0	0.919525	100	Y	Y	N	Y	N	Y
33.2	933071	243177	0.79326	1176248	1176248	Ehrlichia chaffeensis str Arkansas	Alphaproteobacteria	1.28932e+07	-9.4129	4.82612e-21	Y	1.29301e+07	-9.16596	4.91085e-20	Y	0.926818	0.916159	0.918998	100	0.918774	0	0.926249	0.915723	0.918521	100	0.91894	0	N	N	Y	N	Y	N
57	3624792	392155	0.902375	4016947	4576573	Caulobacter crescentus CB15	Alphaproteobacteria	104159893	36.8381	4.53892e-297	Y	104559322	37.4172	2.05331e-306	Y	0.900145	0.937342	0.918688	0	0.918884	100	0.900231	0.938197	0.918726	0	0.919032	100	Y	Y	N	Y	N	Y
60.5	1250211	58548	0.955264	1308759	879959	Candidatus Pelagibacter ubique	Alphaproteobacteria	4020608	2.15387	0.0312506	Y	4.03635e+06	2.33013	0.0197993	Y	0.934121	0.939733	0.918684	100	0.920689	100	0.933746	0.939608	0.918599	100	0.920544	100	Y	Y	Y	Y	Y	Y
60.2	1066462	153857	0.873921	1220319		Brucella_microti_CCM_4915_chromosome_2_complete_sequence	Alphaproteobacteria	10980000	12.3597	4.3155e-35	Y	10998000	12.4974	7.7102e-36	Y	0.918439	0.937192	0.918623	67	0.919834	100	0.918413	0.938217	0.91875	21	0.920168	100	Y	Y	N	Y	N	Y
28.2	2117050	298577	0.876398	2415627		Brucella_microti_CCM_4915_chromosome_1_complete_sequence	Alphaproteobacteria	37336540	18.5503	8.1031e-77	Y	37328000	18.5239	1.3246e-76	Y	0.918914	0.938897	0.91872	75	0.919489	100	0.918808	0.939191	0.918711	65	0.919338	100	Y	Y	N	Y	N	Y
27.7	1027466	129482	0.888083	1156948		Brucella_melitensis_biovar_Abortus_2308_chromosome_II_complete_sequence_strain_2308	Alphaproteobacteria	8965800	13.0788	4.3531e-39	Y	8970400	13.1197	2.5392e-39	Y	0.918052	0.941331	0.918781	8	0.92015	100	0.918113	0.940333	0.918578	15	0.919846	100	Y	Y	N	Y	N	Y
28	1829250	292109	0.862301	2121359		Brucella_melitensis_biovar_Abortus_2308_chromosome_I_complete_sequence_strain_2308	Alphaproteobacteria	37053000	19.7503	7.9684e-87	Y	37130517	20.0024	5.2477e-89	Y	0.918652	0.940609	0.918773	35	0.919404	100	0.918503	0.93997	0.918727	24	0.919227	100	Y	Y	N	Y	N	Y
29.8	951293	234225	0.802428	1185518		Brucella_melitensis_ATCC_23457_chromosome_II_complete_sequence	Alphaproteobacteria	15025707	7.7082	1.2765e-14	Y	15033000	7.7586	8.5848e-15	Y	0.918874	0.929303	0.918618	76	0.919149	100	0.918962	0.929923	0.918743	70	0.919067	100	Y	Y	N	Y	N	Y
27.5	1757663	368038	0.826863	2125701		Brucella_melitensis_ATCC_23457_chromosome_I_complete_sequence	Alphaproteobacteria	44806000	16.8181	1.7989e-63	Y	45065000	17.5852	3.2007e-69	Y	0.918604	0.9364	0.918678	39	0.919357	100	0.918771	0.934975	0.918691	56	0.919081	100	Y	Y	N	Y	N	Y
29.1	1010624	196176	0.837441	1206800		Brucella_canis_ATCC23365_chromosome_II_complete_sequence	Alphaproteobacteria	13055311	8.6605	4.6955e-18	Y	12997000	8.2483	1.6068e-16	Y	0.918804	0.930566	0.918728	48	0.919779	100	0.918878	0.931467	0.91872	63	0.919517	100	Y	Y	N	Y	N	Y
27	1772884	333085	0.841838	2105969		Brucella_canis_ATCC_23365_chromosome_I_complete_sequence	Alphaproteobacteria	40620740	17.2664	8.4197e-67	Y	40646431	17.3462	2.1056e-67	Y	0.919008	0.936834	0.918641	82	0.919489	100	0.918935	0.936052	0.918773	74	0.919297	100	Y	Y	N	Y	N	Y
65.5	1161449	974934	0.543652	2136383	2136383	Brucella abortus S19 Chromosome 2	Alphaproteobacteria	12292458	11.0168	3.1722e-28	Y	12316213	11.1958	4.2731e-29	Y	0.918082	0.934045	0.918659	14	0.91953	100	0.918309	0.933742	0.91869	18	0.919218	100	Y	Y	N	Y	N	Y
47.3	1755098	367389	0.826906	2122487	2122487	Brucella abortus S19	Alphaproteobacteria	44921799	17.6037	2.30748e-69	Y	45011251	17.8686	2.07028e-71	Y	0.918656	0.936943	0.918701	48	0.919334	100	0.918668	0.936247	0.918689	44	0.919255	100	Y	Y	N	Y	N	Y	y	y	y	y
57	6391431	1065156	0.857152	7456587	7456587	Bradyrhizobium_sp_ORS278_complete_sequence	Alphaproteobacteria	5.02546e+08	51.2692	0	Y	5.027e+08	51.3444	0	Y	0.895395	0.920963	0.91876	0	0.918933	100	0.895474	0.921032	0.918703	0	0.918986	100	Y	Y	N	Y	N	Y
57	3436334	733819	0.824031	4170153	4170153	Beijerinckia indica	Alphaproteobacteria	182468089	31.4749	1.91818e-217	Y	1.82142e+08	31.1267	1.0487e-212	Y	0.919198	0.941507	0.918756	98	0.919312	100	0.919148	0.942195	0.91871	94	0.919116	100	Y	Y	N	Y	N	Y	y	y	y	y
57	1164861	280160	0.80612	1445021	1445021	Bartonella bacilliformis KC583	Alphaproteobacteria	22651889	12.1824	3.85789e-34	Y	22675640	12.3022	8.81178e-35	Y	0.939255	0.955925	0.919116	100	0.92002	100	0.938969	0.954913	0.918708	100	0.919475	100	Y	Y	Y	Y	Y	Y	y	y	y	y
57	1028190	174245	0.85509	1202435	1202435	Anaplasma marginale str Florida	Alphaproteobacteria	9.14797e+06	-9.89052	4.57652e-23	Y	9074773	-10.437	1.68117e-25	Y	0.921685	0.908838	0.918676	100	0.918683	0	0.922156	0.909344	0.918769	100	0.918808	0	N	N	Y	N	Y	N	N	N	N	N
57	1133989	149198	0.883729	1283187		Agrobacterium_vitis_S4_chromosome_2_complete_sequence	Alphaproteobacteria	11550000	14.7614	2.5967e-49	Y	11582282	15.0001	7.3291e-51	Y	0.911588	0.934299	0.918708	0	0.919427	100	0.911519	0.933409	0.918646	0	0.91912	100	Y	Y	N	Y	N	Y
57	3161084	565291	0.8483	3726375		Agrobacterium_vitis_S4_chromosome_1_complete_sequence	Alphaproteobacteria	127958924	30.4145	3.5316e-203	Y	127663820	30.0183	5.6627e-198	Y	0.911084	0.934665	0.918697	0	0.91937	100	0.9109	0.934649	0.918706	0	0.919316	100	Y	Y	N	Y	N	Y
57	2357230	293683	0.889214	2650913	2650913	Agrobacterium_radiobacter_k84_chromosome_2	Alphaproteobacteria	46211000	18.6595	1.0573e-77	Y	46399003	19.14	1.1717e-81	Y	0.912118	0.931157	0.918679	0	0.919669	100	0.912106	0.93109	0.918616	0	0.919542	100	Y	Y	N	Y	N	Y
57	3449017	556113	0.86115	4005130	4005130	Agrobacterium_radiobacter_k84_chromosome_1	Alphaproteobacteria	135368944	30.0019	9.26487e-198	Y	135166886	29.7494	1.76671e-194	Y	0.91096	0.934221	0.918656	0	0.919476	100	0.910818	0.93402	0.918755	0	0.919349	100	Y	Y	N	Y	N	Y	Y	Y	Y	Y
57	3102654	286573	0.915446	3389227	3389227	Acidiphilium cryptum	Alphaproteobacteria	57682895	18.227	3.15135e-74	Y	5.77212e+07	18.3034	7.77089e-75	Y	0.905315	0.923307	0.918581	0	0.919601	100	0.90514	0.92357	0.918721	0	0.91967	100	Y	Y	N	Y	N	Y	Y	Y	Y	N
57	2600624	306871	0.894455	2907495	2907495	Acetobacter_pasteurianus_IFO_3283-01_DNA_complete_genome	Alphaproteobacteria	5.40292e+07	21.4434	5.2644e-102	Y	5.38243e+07	20.9775	1.05204e-97	Y	0.922816	0.946021	0.918654	100	0.919802	100	0.923011	0.947806	0.918707	100	0.920114	100	Y	Y	Y	Y	Y	Y
20.2	1576026	262416	0.857262	1838442	1838442	Sulfurihydrogenibium_sp_YO3AOP1_complete_genome	Aquificae	2.7676e+07	14.1228	2.74692e-45	Y	27722742	14.3086	1.93345e-46	Y	0.945921	0.967057	0.918495	100	0.921022	100	0.946456	0.968317	0.918739	100	0.921026	100	Y	Y	Y	Y	Y	Y
26.3	1548395	92482	0.943639	1640877	1640877	Sulfurihydrogenibium_azorense_Az-Fu1_complete_genome	Aquificae	8145033	4.03638	5.42829e-05	Y	8.05199e+06	3.3711	0.000748694	Y	0.955313	0.963413	0.91855	100	0.925241	100	0.955271	0.965259	0.918482	100	0.925429	100	Y	Y	Y	Y	Y	Y
66	1821177	109107	0.943476	1930284	1930284	Persephonella_marina_EX-H1_complete_genome	Aquificae	1.14478e+07	5.13512	2.8196e-07	Y	11324264	4.44407	8.82736e-06	Y	0.960574	0.972015	0.918665	100	0.927545	100	0.960973	0.975775	0.918593	100	0.927923	100	Y	Y	Y	Y	Y	Y
66	1478817	80697	0.948255	1559514	1559514	Hydrogenobaculum_sp_Y04AAS1_complete_genome	Aquificae	6219323	-0.525972	0.598908	Y	6.14613e+06	-1.11404	0.265263	Y	0.939341	0.937937	0.918574	100	0.920579	100	0.939016	0.939005	0.918573	100	0.921023	100	N	N	Y	Y	Y	Y
66	1440796	110539	0.928746	1551335	1551335	Aquifex_aeolicus	Aquificae	8346521	-1.5643	0.117748	N	8.44856e+06	-0.853013	0.393652	N	0.978871	0.978513	0.918671	100	0.925696	100	0.97844	0.977363	0.918517	100	0.925395	100	N	N	Y	Y	Y	Y	N	N	N	N
66	5319402	777470	0.872481	6096872	6096872	Flavobacterium johnsoniae UW101	Bacteroidetes/Chloribi	256784530	13.6586	1.79453e-42	Y	2.58104e+08	14.569	4.42131e-48	Y	0.937167	0.947745	0.918632	100	0.919188	100	0.937646	0.947888	0.918758	100	0.919371	100	Y	Y	Y	Y	Y	Y
66	3983571	449647	0.898573	4433218	4433218	Cytophaga hutchinsonii	Bacteroidetes/Chloribi	1.06577e+08	8.50513	1.81396e-17	Y	1.068e+08	8.78012	1.63297e-18	Y	0.927178	0.935323	0.918749	100	0.918972	100	0.927018	0.934468	0.918711	100	0.918916	100	Y	Y	Y	Y	Y	Y
66	2852123	441333	0.865997	3293456	3696649	Chloroherpeton thalassium ATCC 35110	Bacteroidetes/Chloribi	93107570	34.7713	6.61047e-265	Y	92679589	34.0431	5.13422e-254	Y	0.925363	0.957932	0.918736	100	0.919583	100	0.925193	0.959488	0.918693	100	0.919885	100	Y	Y	Y	Y	Y	Y
66	2270318	301761	0.882678	2572079	2572079	Chlorobium chlorochromatii CaD3	Bacteroidetes/Chloribi	50419009	30.3238	5.56591e-202	Y	5.03124e+07	30.0457	2.48445e-198	Y	0.922842	0.959954	0.918426	100	0.920397	100	0.922787	0.960422	0.918623	100	0.920421	100	Y	Y	Y	Y	Y	Y
65	1989537	299712	0.869078	2289249	2289249	Chlorobaculum parvum NCIB 8327	Bacteroidetes/Chloribi	4.27333e+07	24.9897	7.91757e-138	Y	42745931	25.027	3.10921e-138	Y	0.917859	0.946218	0.918697	0	0.920037	100	0.917786	0.946014	0.918814	0	0.919987	100	Y	Y	N	Y	N	Y
67	225548	19982	0.918617	245530	245530	Candidatus Sulcia muelleri GWSS	Bacteroidetes/Chloribi	214682	-3.08819	0.00201382	Y	223272	-2.19172	0.0283997	Y	0.950772	0.940059	0.918679	100	0.921277	100	0.950724	0.936358	0.918397	100	0.91857	100	N	N	Y	Y	Y	Y
63	1436608	447756	0.762383	1884364	1590757	Candidatus Amoebophilus asiaticus 5a2	Bacteroidetes/Chloribi	42006613	-0.552799	0.580401	N	4.19344e+07	-0.780046	0.435364	N	0.935488	0.934049	0.918675	100	0.91899	100	0.934405	0.933175	0.918689	100	0.918904	100	N	N	Y	Y	Y	Y
62	3530383	298560	0.922025	3828943	3530383	Robiginitalea_biformata_HTCC2501_complete_genome	Bacteroidetes/Chlorobi	5.55044e+07	5.28068	1.28702e-07	Y	5.58217e+07	5.87625	4.19657e-09	Y	0.927904	0.933798	0.918629	100	0.919316	100	0.928201	0.933757	0.918785	100	0.919431	100	Y	Y	Y	Y	Y	Y
62	2201666	311257	0.876137	2512923	2512923	Prosthecochloris_aestuarii_DSM_271_complete_genome	Bacteroidetes/Chlorobi	4.41782e+07	13.4049	5.65845e-41	Y	4.40175e+07	12.9806	1.57666e-38	Y	0.933493	0.94849	0.918684	100	0.919926	100	0.933627	0.950731	0.918699	100	0.920099	100	Y	Y	Y	Y	Y	Y
62	4791791	375592	0.927315	5167383	5167383	Pedobacter_heparinus_DSM_2366_complete_genome	Bacteroidetes/Chlorobi	103937319	7.86313	3.74643e-15	Y	1.03836e+08	7.748	9.33489e-15	Y	0.93077	0.93907	0.918668	100	0.919852	100	0.931002	0.939234	0.918737	100	0.9197	100	Y	Y	Y	Y	Y	Y
67	2429636	432352	0.848933	2861988	2861988	Flavobacterium_psychrophilum_JIP02-86_complete_genome	Bacteroidetes/Chlorobi	6.74913e+07	11.2472	2.39034e-29	Y	6.75145e+07	11.2934	1.41492e-29	Y	0.93573	0.946814	0.918479	100	0.919071	100	0.936282	0.947976	0.918831	100	0.919149	100	Y	Y	Y	Y	Y	Y
68	1898650	256296	0.881066	2154946	2154946	Chlorobium_tepidum_TLS_complete_genome	Bacteroidetes/Chlorobi	32831536	17.6867	5.30497e-70	Y	3.28898e+07	17.8839	1.57433e-71	Y	0.919584	0.94091	0.918747	100	0.919906	100	0.919511	0.94132	0.918705	100	0.920054	100	Y	Y	Y	Y	Y	Y
66	8062695	1064652	0.883356	9127347	9127347	Chitinophaga_pinensis_DSM_2588_complete_genome	Bacteroidetes/Chlorobi	5.24963e+08	15.3094	6.61494e-53	Y	5.23179e+08	14.611	2.39079e-48	Y	0.92991	0.938723	0.918723	100	0.919117	100	0.929746	0.939216	0.918704	100	0.91922	100	Y	Y	Y	Y	Y	Y
66	1931091	412385	0.824028	2343476	2343476	Porphyromonas_gingivalis_W83_complete_genome	Bacteroidetes/Chlorobi	5.35097e+07	13.1891	1.01403e-39	Y	53357886	12.8041	1.55464e-37	Y	0.944232	0.96036	0.918728	100	0.919793	100	0.944071	0.961259	0.918754	100	0.920051	100	Y	Y	Y	Y	Y	Y
66	4948020	618729	0.888853	5566749	5566749	Verminephrobacter_eiseniae_EF01-2	Betaproteobacteria	206061978	28.4078	1.61954e-177	Y	206644012	28.8962	1.3317e-183	Y	0.910008	0.891848	0.918724	0	0.919583	0	0.892037	0.910237	0.918709	0	0.919673	0	N	N	N	N	N	N
62.6	1001995	126649	0.887787	1128644		Variovorax_paradoxus_S110_chromosome_2_complete_sequence	Betaproteobacteria	9114095	18.0375	9.8858e-73	Y	9136160	18.2396	2.505e-74	Y	0.895959	0.92241	0.918729	0	0.919443	97	0.896083	0.923053	0.918698	0	0.919539	99	Y	Y	N	N	N	N
62.6	5173012	453341	0.919425	5626353		Variovorax_paradoxus_S110_chromosome_1_complete_sequence	Betaproteobacteria	177361102	47.5319	0	Y	177303818	47.4773	0	Y	0.894256	0.934643	0.918722	0	0.920522	100	0.894365	0.93494	0.918689	0	0.920724	100	Y	Y	N	Y	N	Y
62.6	4228386	483951	0.897301	4712337	4712337	Rhodoferax_ferrireducens_T118_complete_genome	Betaproteobacteria	1.40238e+08	29.2563	3.73593e-188	Y	140303322	29.329	4.42904e-189	Y	0.897593	0.919019	0.918685	0	0.919209	38	0.897528	0.919358	0.918721	0	0.919289	51	Y	Y	N	N	N	N
43.1	1146954	155284	0.880756	1302238		Ralstonia_pickettii_12J_chromosome_2_complete_sequence	Betaproteobacteria	12857000	19.8045	2.7204e-87	Y	12916000	20.224	6.0198e-91	Y	0.892514	0.919752	0.918609	0	0.91926	61	0.892294	0.918931	0.918708	0	0.91934	38	Y	Y	N	N	N	N
39.3	3474948	467609	0.881394	3942557		Ralstonia_pickettii_12J_chromosome_1_complete_sequence	Betaproteobacteria	117964095	35.2926	7.635e-273	Y	118385699	35.8696	9.099e-282	Y	0.89461	0.922179	0.918677	0	0.919466	100	0.894612	0.922416	0.918699	0	0.919622	100	Y	Y	N	Y	N	Y
31.7	2402123	324029	0.881141	2726152		Ralstonia_eutropha_JMP134_chromosome_2_complete_sequence	Betaproteobacteria	107460000	39.2647	0	Y	108120000	40.2343	0	Y	0.891345	0.919805	0.918755	0	0.919423	63	0.891501	0.919793	0.91867	0	0.919187	76	Y	Y	N	N	N	N
29.6	3381140	425393	0.888247	3806533		Ralstonia_eutropha_JMP134_chromosome_1_complete_sequence	Betaproteobacteria	107460000	39.2647	0	Y	108120000	40.2343	0	Y	0.891467	0.922647	0.918657	0	0.919142	100	0.891337	0.922133	0.918682	0	0.919449	100	Y	Y	N	Y	N	Y
35	1217126	343343	0.779974	1560469	1560469	Polynucleobacter_necessarius_subsp_necessarius_STIR1_complete_genome	Betaproteobacteria	28723633	8.31261	9.36184e-17	Y	28687575	8.15792	3.40842e-16	Y	0.913943	0.922487	0.918698	0	0.919408	100	0.913809	0.922292	0.91873	0	0.919328	100	Y	Y	N	Y	N	Y
49	4568196	632068	0.878455	5200264	5200264	Polaromonas_sp_JS666_complete_genome	Betaproteobacteria	203771288	35.2656	1.9779e-272	Y	2.04659e+08	36.0596	9.76208e-285	Y	0.898919	0.924623	0.918698	0	0.919767	100	0.899117	0.924058	0.91864	0	0.919851	100	Y	Y	N	Y	N	Y
54.5	2267133	544961	0.806208	2812094	2812094	Nitrosomonas_europaea_ATCC_19718_complete_genome	Betaproteobacteria	82970183	11.8105	3.44662e-32	Y	82918425	11.7143	1.07719e-31	Y	0.9159	0.925734	0.918684	0	0.919138	100	0.91639	0.926296	0.918731	0	0.919272	100	Y	Y	N	Y	N	Y
54.5	2277954	269616	0.894167	2547570	2547570	Methylotenera_mobilis_JLW8_complete_genome	Betaproteobacteria	3.82379e+07	10.7907	3.80697e-27	Y	3.81803e+07	10.6313	2.13226e-26	Y	0.902933	0.914179	0.918704	0	0.919073	100	0.902812	0.913563	0.918703	0	0.918946	100	Y	Y	N	Y	N	Y
29.7	3663279	446972	0.891254	4110251	4110251	janthinobacterium sp Marseille	Betaproteobacteria	118827623	36.0374	2.17421e-284	Y	118983059	36.245	1.193e-287	Y	0.904107	0.933814	0.918709	0	0.919969	100	0.904187	0.934248	0.918731	0	0.919906	100	Y	Y	N	Y	N	Y
34	4119586	381518	0.915239	4501104	4501104	Dechloromonas aromatica RCB	Betaproteobacteria	1.06849e+08	27.3392	1.45127e-164	Y	1.06472e+08	26.8481	8.86773e-159	Y	0.906948	0.929843	0.918646	0	0.919859	100	0.906933	0.930508	0.918688	0	0.919651	100	Y	Y	N	Y	N	Y
22.4	2233060	269351	0.892363	2502411	2502411	Cupriavidus taiwanensis str LMG19424 Chromosome 2	Betaproteobacteria	44973000	31.8489	1.3649e-222	Y	44843553	31.4835	1.4593e-217	Y	0.887726	0.920881	0.918689	0	0.919218	95	0.887687	0.919867	0.918666	0	0.919165	72	Y	Y	N	N	N	N
31.6	3043708	373203	0.890778	3416911	4934271	Cupriavidus taiwanensis str LMG19424	Betaproteobacteria	86075955	39.237	0	Y	8.60205e+07	39.1395	0	Y	0.888428	0.92127	0.918687	0	0.919481	99	0.888414	0.922288	0.918685	0	0.919452	99	Y	Y	N	N	N	N
58.4	1254185	217594	0.852156	1471779		Burkholderia_xenovorans_LB400_chromosome_3_complete_sequence	Betaproteobacteria	18453000	13.3872	7.1835e-41	Y	18601000	14.1943	9.9347e-46	Y	0.898122	0.912829	0.918653	0	0.918859	0	0.898169	0.912302	0.91875	0	0.919003	0	Y	Y	N	N	N	N
27.4	2912789	450734	0.865993	3363523		Burkholderia_xenovorans_LB400_chromosome_2_complete_sequence	Betaproteobacteria	94210000	30.3569	2.0357e-202	Y	94086000	30.1515	1.025e-199	Y	0.893199	0.914472	0.918684	0	0.919114	0	0.893273	0.914358	0.918731	0	0.91879	0	Y	Y	N	N	N	N
61.9	4205806	690030	0.859058	4895836		Burkholderia_xenovorans_LB400_chromosome_1_complete_sequence	Betaproteobacteria	205310000	33.4572	2.0249e-245	Y	205740000	33.8527	3.3144e-251	Y	0.893905	0.914268	0.918705	0	0.919293	0	0.894073	0.913928	0.918723	0	0.919249	0	Y	Y	N	N	N	N
67.2	1052092	188915	0.847773	1241007		Burkholderia_vietnamiensis_G4_chromosome_3_complete_sequence	Betaproteobacteria	14006180	15.9391	3.3927e-57	Y	13967000	15.6661	2.5794e-55	Y	0.884179	0.901063	0.91875	0	0.919014	0	0.884349	0.900686	0.918687	0	0.918376	0	Y	Y	N	N	N	N
52	2050028	361731	0.850014	2411759		Burkholderia_vietnamiensis_G4_chromosome_2_complete_sequence	Betaproteobacteria	53253493	24.9619	1.5843e-137	Y	53192441	24.8038	8.162e-136	Y	0.883369	0.90121	0.918673	0	0.918869	0	0.883367	0.901799	0.9187	0	0.919019	0	Y	Y	N	N	N	N
45.2	3152142	500672	0.862935	3652814		Burkholderia_vietnamiensis_G4_chromosome_1_complete_sequence	Betaproteobacteria	115297125	34.4387	6.644e-260	Y	115670000	34.982	4.23e-268	Y	0.887612	0.911267	0.918703	0	0.919407	0	0.887421	0.91031	0.918654	0	0.919257	0	Y	Y	N	N	N	N
40.3	2744817	436945	0.862672	3181762		Burkholderia_pseudomallei_1710b_chromosome_II_complete_sequence	Betaproteobacteria	82827000	23.6229	2.2433e-123	Y	82539000	23.1128	3.4435e-118	Y	0.886118	0.902514	0.918616	0	0.918907	0	0.885731	0.902015	0.918683	0	0.918789	0	Y	Y	N	N	N	N
41.3	3528263	598029	0.855069	4126292		Burkholderia_pseudomallei_1710b_chromosome_I_complete_sequence	Betaproteobacteria	149969107	31.2214	5.4579e-214	Y	150060000	31.3331	1.6552e-215	Y	0.889413	0.908896	0.918623	0	0.919177	0	0.889251	0.908656	0.918718	0	0.919161	0	Y	Y	N	N	N	N
41.3	3089563	536436	0.852058	3625999		Burkholderia_phytofirmans_PsJN_chromosome_2_complete_sequence	Betaproteobacteria	119220000	31.0475	1.2349e-211	Y	119040854	30.7952	3.043e-208	Y	0.893894	0.913941	0.918708	0	0.91887	0	0.893756	0.913839	0.918748	0	0.918959	0	Y	Y	N	N	N	N
39.3	3810783	656754	0.852994	4467537		Burkholderia_phytofirmans_PsJN_chromosome_1_complete_sequence	Betaproteobacteria	183010000	37.6273	0	Y	183270000	37.8983	0	Y	0.892592	0.915412	0.918716	0	0.919215	0	0.892571	0.915613	0.918672	0	0.919234	0	Y	Y	N	N	N	N
40.6	2285243	412131	0.84721	2697374		Burkholderia_phymatum_STM815_chromosome_2_complete_sequence	Betaproteobacteria	68242813	27.5228	9.3633e-167	Y	68263000	27.5671	2.7593e-167	Y	0.895296	0.916857	0.918715	0	0.919007	0	0.895281	0.91687	0.918688	0	0.91895	0	Y	Y	N	N	N	N
55.8	2994682	484505	0.860742	3479187		Burkholderia_phymatum_STM815_chromosome_1_complete_sequence	Betaproteobacteria	103350000	29.3995	5.5663e-190	Y	103550000	29.705	6.6194e-194	Y	0.895079	0.916783	0.918619	0	0.919036	0	0.894957	0.916785	0.918734	0	0.919407	0	Y	Y	N	N	N	N
44.3	773218	146587	0.840633	919805		Burkholderia_multivorans_ATCC_17616_genomic_DNA_complete_genome_chromosome_3	Betaproteobacteria	8260500	16.3451	4.712e-60	Y	8199989	15.6953	1.6287e-55	Y	0.886136	0.906082	0.918729	0	0.918921	0	0.886097	0.905129	0.918674	0	0.918537	0	Y	Y	N	N	N	N
56.5	2132940	340222	0.862434	2473162		Burkholderia_multivorans_ATCC_17616_genomic_DNA_complete_genome_chromosome_2	Betaproteobacteria	52387000	26.6806	7.8996e-157	Y	52389393	26.6875	6.5745e-157	Y	0.882988	0.904124	0.918659	0	0.919003	0	0.882655	0.904131	0.918684	0	0.918821	0	Y	Y	N	N	N	N
56.4	2989733	458688	0.866986	3448421		Burkholderia_multivorans_ATCC_17616_DNA_complete_genome_chromosome_1	Betaproteobacteria	100780000	34.5861	4.0926e-262	Y	100480000	34.109	5.4214e-255	Y	0.885586	0.909544	0.918653	0	0.919151	0	0.885538	0.909824	0.918703	0	0.919077	0	Y	Y	N	N	N	N
56.7	1057288	167307	0.863378	1224595		Burkholderia_cenocepacia_MC0-3_chromosome_3_complete_sequence	Betaproteobacteria	13090401	21.1887	1.2133e-99	Y	12969481	20.2887	1.6195e-91	Y	0.885158	0.909261	0.91872	0	0.919218	0	0.885342	0.909156	0.918639	0	0.918782	0	Y	Y	N	N	N	N
56.7	2776462	437449	0.863889	3213911		Burkholderia_cenocepacia_MC0-3_chromosome_2_complete_sequence	Betaproteobacteria	91723817	37.5874	0	Y	91721000	37.583	0	Y	0.883691	0.90958	0.918705	0	0.919066	0	0.883886	0.90974	0.918689	0	0.918976	0	Y	Y	N	N	N	N
45	3063544	469339	0.867151	3532883		Burkholderia_cenocepacia_MC0-3_chromosome_1_complete_sequence	Betaproteobacteria	109261081	40.52	0	Y	109718156	41.2226	0	Y	0.885876	0.914509	0.918701	0	0.919169	0	0.885916	0.914205	0.918702	0	0.91939	0	Y	Y	N	N	N	N
63.9	1123834	157638	0.876987	1281472	1281472	Burkholderia ambifaria AMMD Chromosome 3	Betaproteobacteria	12912674	20.465	4.4198e-93	Y	12915883	20.4883	2.7378e-93	Y	0.885239	0.908282	0.91869	0	0.918739	0	0.885496	0.908077	0.918681	0	0.918809	0	Y	Y	N	N	N	N
53.8	2299998	346971	0.868918	2646969	2646969	Burkholderia ambifaria AMMD Chromosome 2	Betaproteobacteria	59224000	31.7375	4.7305e-221	Y	59181000	31.6357	1.1938e-219	Y	0.88393	0.909398	0.918737	0	0.919163	0	0.883937	0.909641	0.918674	0	0.919021	0	Y	Y	N	N	N	N
72.4	3106811	449734	0.873548	3556545	2077567	Burkholderia ambifaria AMMD Chromosome 1	Betaproteobacteria	1.05619e+08	39.8589	0	Y	105635017	39.8842	0	Y	0.885592	0.913997	0.918758	0	0.919349	0	0.88535	0.913461	0.918689	0	0.919454	0	Y	Y	N	N	N	N	y	y	y	y
30.9	3992297	383743	0.912308	4376040	4376040	Azoarcus sp BH72	Betaproteobacteria	114555586	40.9454	0	Y	1.14633e+08	41.0485	0	Y	0.899729	0.939427	0.918683	0	0.920017	100	0.899731	0.939507	0.918661	0	0.920167	100	Y	Y	N	Y	N	Y	y	y	y	y
28.2	3905277	543579	0.877816	4448856	4448856	Acidovorax sp	Betaproteobacteria	146416878	28.7705	5.02216e-182	Y	146816098	29.2205	1.06375e-187	Y	0.897399	0.917722	0.918685	0	0.919444	0	0.897381	0.917197	0.918682	0	0.919383	0	Y	Y	N	N	N	N	y	y	y	y
38	1983795	430670	0.821629	2414465	2414465	Parachlamydia related symbiont UWE25	Chlamydiae/Verrucomicrobia	52839546	2.06849	0.0385941	Y	5.28077e+07	1.99156	0.0464194	Y	0.950488	0.952339	0.918731	100	0.919533	100	0.950631	0.952961	0.918762	100	0.919582	100	Y	Y	Y	Y	Y	Y
44.8	1097297	129268	0.89461	1226565	1226565	Chlamydophila_pneumoniae_J138_genomic_DNA_complete_sequence	Chlamydiae/Verrucomicrobia	9.00084e+06	8.95286	3.46376e-19	Y	8.96222e+06	8.63198	6.03004e-18	Y	0.952541	0.96875	0.918818	100	0.9204	100	0.952124	0.969909	0.918652	100	0.920265	100	Y	Y	Y	Y	Y	Y
42.6	1059670	106569	0.908622	1166239	1166239	Chlamydophila_felis_Fe_C-56_DNA_complete_genome	Chlamydiae/Verrucomicrobia	7078711	8.29521	1.08398e-16	Y	7049829	8.01941	1.06254e-15	Y	0.951908	0.971749	0.918609	100	0.921438	100	0.952112	0.971205	0.918796	100	0.920709	100	Y	Y	Y	Y	Y	Y
67	924555	114314	0.889963	1038869	1038869	Chlamydia_trachomatis_L2b_UCH-1_proctitis_complete_genome	Chlamydiae/Verrucomicrobia	6906906	10.1372	3.77842e-24	Y	7073153	11.8753	1.59042e-32	Y	0.955962	0.985933	0.918729	100	0.920979	100	0.955283	0.9793	0.918762	100	0.920315	100	Y	Y	Y	Y	Y	Y
67	934989	107530	0.896856	1042519	1042519	Chlamydia_trachomatis_D-UW-3-CX_complete_genome	Chlamydiae/Verrucomicrobia	6.55473e+06	10.1808	2.4168e-24	Y	6.67747e+06	11.4943	1.40933e-30	Y	0.95639	0.985406	0.918622	100	0.92063	100	0.956334	0.980524	0.918747	100	0.920304	100	Y	Y	Y	Y	Y	Y
37.9	961248	111702	0.895893	1072950	4684931	Chlamydia muridarum Nigg	Chlamydiae/Verrucomicrobia	6.67527e+06	6.96631	3.25357e-12	Y	6789796	8.13516	4.11405e-16	Y	0.958641	0.977436	0.918674	100	0.920756	100	0.958071	0.972952	0.918737	100	0.920237	100	Y	Y	Y	Y	Y	Y
37	4912130	889468	0.846686	5801598	5801598	Roseiflexus_sp_RS-1_complete_genome	Chloroflexi	324053159	45.4518	0	Y	3.24886e+08	46.0249	0	Y	0.902817	0.932882	0.91867	0	0.919606	100	0.902886	0.932757	0.91871	0	0.919682	100	Y	Y	N	Y	N	Y
38	4699584	1023714	0.821132	5723298	5723298	Roseiflexus_castenholzii_DSM_13941_complete_genome	Chloroflexi	379216374	56.9529	0	Y	3.78645e+08	56.5755	0	Y	0.901684	0.938538	0.918645	0	0.919869	100	0.901612	0.937207	0.918671	0	0.919372	100	Y	Y	N	Y	N	Y
39.8	5572162	774425	0.877978	6346587	6346587	Herpetosiphon_aurantiacus_ATCC_23779_complete_genome	Chloroflexi	338267698	61.25	0	Y	3.38374e+08	61.3201	0	Y	0.888958	0.932112	0.918706	0	0.918559	100	0.888914	0.931563	0.918722	0	0.918346	100	Y	Y	N	Y	N	Y
38.8	1202039	139853	0.895779	1341892	1341892	Dehalococcoides_sp_BAV1_complete_genome	Chloroflexi	10443288	7.75758	8.65685e-15	Y	10424111	7.61768	2.58279e-14	Y	0.928526	0.941573	0.918641	100	0.920686	100	0.928571	0.943714	0.91875	100	0.921029	100	Y	Y	Y	Y	Y	Y
59.2	1317752	151968	0.896601	1469720	1469720	Dehalococcoides ethenogenes 195	Chloroflexi	1.25519e+07	8.87484	7.00312e-19	Y	1.25324e+07	8.75043	2.12548e-18	Y	0.928786	0.942296	0.918829	100	0.920584	100	0.928939	0.943631	0.918716	100	0.920494	100	Y	Y	Y	Y	Y	Y
48.9	4292616	976334	0.8147	5268950	5268950	Chloroflexus_sp_Y-400-fl_complete_genome	Chloroflexi	308013269	37.4544	5.09364e-307	Y	306717653	36.4993	1.13837e-291	Y	0.903613	0.925697	0.918713	0	0.919209	100	0.903518	0.931613	0.918729	0	0.919378	100	Y	Y	N	Y	N	Y
47.2	4225508	1033033	0.803551	5258541	5258541	Chloroflexus_aurantiacus_J-10-fl_complete_genome	Chloroflexi	324367715	38.1491	0	Y	3.23546e+08	37.5549	0	Y	0.903168	0.925542	0.918641	0	0.918987	100	0.903048	0.929677	0.918723	0	0.919183	100	Y	Y	N	Y	N	Y
66.5	4050564	634367	0.864594	4684931	3293456	Chloroflexus aggregans DSM9485	Chloroflexi	183067408	34.4337	7.90564e-260	Y	1.82529e+08	33.8964	7.538e-252	Y	0.90239	0.925792	0.918681	0	0.919263	100	0.902513	0.926739	0.918733	0	0.919304	100	Y	Y	N	Y	N	Y
63	1582068	187755	0.893913	1769823	1769823	Thermoproteus_neutrophilus_V24Sta	Crenarchaeota	15955343	-3.12625	0.00177049	Y	1.61122e+07	-2.37648	0.0174787	Y	0.942964	0.940128	0.918876	100	0.920171	100	0.942623	0.938142	0.918651	100	0.920316	100	N	N	Y	Y	Y	Y
67	2331868	370190	0.862997	2702058	2702058	Sulfolobus_islandicus_Y.G.57.14_complete_genome	Crenarchaeota	5.30561e+07	6.93166	4.15926e-12	Y	52796537	6.34285	2.25548e-10	Y	0.938446	0.945555	0.918888	100	0.920281	100	0.93823	0.945666	0.918731	100	0.920258	100	Y	Y	Y	Y	Y	Y
66	1366261	204224	0.869961	1570485	1570485	Staphylothermus_marinus_F1_complete_genome	Crenarchaeota	1.75156e+07	7.74958	9.21963e-15	Y	17453203	7.42311	1.14406e-13	Y	0.923925	0.934545	0.919159	100	0.919883	100	0.922976	0.933954	0.918571	100	0.919733	100	Y	Y	Y	Y	Y	Y
54.5	1585813	240589	0.868272	1826402	1826402	Pyrobaculum_islandicum_DSM_4184_complete_genome	Crenarchaeota	2.34903e+07	6.34142	2.27662e-10	Y	2.32701e+07	5.42757	5.71255e-08	Y	0.936584	0.943991	0.918864	100	0.92011	100	0.937096	0.945302	0.9188	100	0.920266	100	Y	Y	Y	Y	Y	Y
56.2	1815397	193916	0.903491	2009313	2009313	Pyrobaculum_calidifontis_JCM_11548_complete_genome	Crenarchaeota	19350204	-0.535319	0.59243	N	19651797	0.706979	0.479579	N	0.941337	0.943937	0.918751	100	0.921398	100	0.941299	0.940915	0.91876	100	0.921394	100	Y	N	Y	Y	Y	Y
50.5	1483450	161809	0.901651	1645259	1645259	Nitrosopumilus_maritimus_SCM1_complete_genome	Crenarchaeota	1.37453e+07	2.39683	0.0165376	Y	1.37966e+07	2.67997	0.00736288	Y	0.929405	0.933589	0.91871	100	0.919758	100	0.929657	0.932748	0.918943	100	0.919549	100	Y	Y	Y	Y	Y	Y
64.2	1917892	273625	0.875144	2191517	2174500	Metallosphaera sedula DSM 5348	Crenarchaeota	2.83255e+07	-5.344	9.09178e-08	Y	2.79513e+07	-6.5526	5.65433e-11	Y	0.957515	0.948115	0.918972	100	0.920031	100	0.955467	0.948056	0.918647	100	0.919951	100	N	N	Y	Y	Y	Y
30.1	1193450	104088	0.91978	1297538	1297538	Ignicoccus hospitalis KIN4 I	Crenarchaeota	7878436	9.76692	1.56128e-22	Y	7892154	9.88534	4.81955e-23	Y	0.948321	0.969302	0.918815	100	0.92253	100	0.949158	0.972784	0.918786	100	0.922944	100	Y	Y	Y	Y	Y	Y
54.6	1346394	320769	0.807596	1667163	1667163	Hyperthermus butylicus DSM 5456	Crenarchaeota	2.9737e+07	12.27	1.31327e-34	Y	29877163	12.8423	9.50645e-38	Y	0.914605	0.928342	0.918768	100	0.919694	100	0.914527	0.927627	0.918794	0	0.919818	100	Y	Y	Y	Y	Y	Y
52.9	1805636	271931	0.869111	2077567	2077567	Caldivirga_maquilingensis_IC-167_complete_genome	Crenarchaeota	30521888	7.80986	5.72506e-15	Y	3.04472e+07	7.55385	4.22574e-14	Y	0.903881	0.911723	0.918853	0	0.918853	0	0.903864	0.912052	0.918821	0	0.918589	0	Y	Y	N	N	N	N
37.4	1475882	193814	0.883923	1669696	1669696	Aeropyrum pernix K1	Crenarchaeota	15997220	-0.913197	0.361139	N	1.59397e+07	-1.20137	0.229607	N	0.936268	0.935458	0.91874	100	0.920217	100	0.936988	0.935573	0.918865	100	0.920309	100	N	N	Y	Y	Y	Y	N	Y	Y	Y
35	2320360	273497	0.89456	2593857	2593857	Thermosynechococcus_elongatus_BP-1_DNA_complete_genom	Cyanobacteria	40855758	14.579	3.82137e-48	Y	4.08853e+07	14.6588	1.18371e-48	Y	0.926999	0.943442	0.918766	100	0.919701	100	0.926876	0.943459	0.918689	100	0.919733	100	Y	Y	Y	Y	Y	Y
32.1	2359350	336905	0.875047	2696255	2696255	Synechococcus_elongatus_PCC_6301_DNA_complete_genome	Cyanobacteria	5.4654e+07	21.8524	7.38197e-106	Y	54530850	21.5609	4.18416e-103	Y	0.907994	0.927761	0.918636	0	0.919101	100	0.907954	0.928023	0.918713	0	0.919239	100	Y	Y	N	Y	N	Y
34.1	1545219	163985	0.904058	1709204	1709204	Prochlorococcus_marinus_str_MIT_9312_complete_genome	Cyanobacteria	13832079	-0.92043	0.357348	N	13867157	-0.735738	0.46189	N	0.943267	0.94197	0.918881	100	0.919426	100	0.943251	0.941453	0.918851	100	0.919469	100	N	N	Y	Y	Y	Y
32.5	2254383	428292	0.840349	2682675	2682675	Prochlorococcus_marinus_str_MIT_9303_complete_genome	Cyanobacteria	6.27167e+07	11.3711	5.82587e-30	Y	6.25686e+07	11.0522	2.13857e-28	Y	0.919204	0.928517	0.918659	97	0.919067	100	0.919284	0.929604	0.918715	98	0.919392	100	Y	Y	N	Y	N	Y
32.2	4153507	505512	0.891498	4659019	4659019	Gloebacter violaceus PCC 7421	Cyanobacteria	1.38672e+08	23.1632	1.07107e-118	Y	1.38737e+08	23.2346	2.03628e-119	Y	0.9112	0.928701	0.918695	0	0.919153	100	0.911177	0.928778	0.918665	0	0.919095	100	Y	Y	N	Y	N	Y
72.8	3971775	698038	0.850521	4669813	4669813	Cyanothece_sp_PCC_8802_complete_genome	Cyanobacteria	169273288	6.06288	1.33701e-09	Y	169310391	6.09861	1.06997e-09	Y	0.936871	0.944374	0.918734	100	0.919493	100	0.93681	0.943726	0.918774	100	0.919531	100	Y	Y	Y	Y	Y	Y
27.2	368524	61177	0.857629	429701		Cyanothece_sp_ATCC_51142_linear_chromosome_complete_sequence	Cyanobacteria	1386970	2.6145	0.0089	Y	1390800	2.7493	0.006	Y	0.940525	0.949201	0.91881	100	0.920159	100	0.940104	0.948545	0.918706	100	0.920102	100	Y	Y	Y	Y	Y	Y
52	4276291	657980	0.866651	4934271		Cyanothece_sp_ATCC_51142_circular_chromosome_complete_sequence	Cyanobacteria	171415463	8.4655	2.5507e-17	Y	171760000	8.7831	1.5904e-18	Y	0.941358	0.949963	0.918799	100	0.91996	100	0.941164	0.95005	0.918756	100	0.91983	100	Y	Y	Y	Y	Y	Y
60.3	4276291	657980	0.866651	4934271	4433218	Cyanothece sp	Cyanobacteria	1.70954e+08	8.03664	9.23369e-16	Y	170988289	8.06832	7.12708e-16	Y	0.941299	0.949336	0.918763	100	0.919989	100	0.941114	0.949732	0.91876	100	0.919891	100	Y	Y	Y	Y	Y	Y
54.7	5193714	1172013	0.815887	6365727	6365727	Anabaena variabilis	Cyanobacteria	4.17615e+08	24.8084	7.27706e-136	Y	417141298	24.5446	4.93842e-133	Y	0.922912	0.939459	0.918768	100	0.919456	100	0.922768	0.939544	0.918671	100	0.91949	100	Y	Y	Y	Y	Y	Y	Y	Y	Y	Y
62	5456521	1047203	0.838984	6503724	6503724	Acaryochloris_marina_MBIC11017_complete_genome	Cyanobacteria	374721450	19.4241	4.826e-84	Y	3.74687e+08	19.4046	7.06131e-84	Y	0.923434	0.934481	0.918684	100	0.919129	100	0.92345	0.934511	0.91869	100	0.919287	100	Y	Y	Y	Y	Y	Y	Y	Y	Y	Y
38.2	1799178	95699	0.949496	1894877	1894877	Thermus_thermophilus_HB27	Deinococcus-Thermus	8844226	-1.29201	0.196355	N	8.76395e+06	-1.77912	0.0752202	N	0.985487	0.981961	0.98429	100	0.987482	100	0.98429	0.987482	0.918707	100	0.925226	100	N	Y	Y	Y	Y	Y
53.9	366785	45563	0.889504	412348	412348	Deinococcus_radiodurans_R1_chromosome_2_complete_sequence	Deinococcus-Thermus	1173563	9.8393	7.622e-23	Y	1168800	9.6419	5.3209e-22	Y	0.911624	0.942463	0.918807	0	0.920865	100	0.911386	0.945495	0.918437	0	0.921434	100	Y	Y	N	Y	N	Y
62	2328525	320113	0.879141	2648638	2648638	Deinococcus_radiodurans_R1_chromosome_1_complete_sequence	Deinococcus-Thermus	56608772	35.0497	3.94104e-269	Y	5.63907e+07	34.5121	5.28946e-261	Y	0.911291	0.954154	0.918703	0	0.920953	100	0.911395	0.955227	0.918739	100	0.920684	100	Y	Y	N	Y	N	Y
57	2443756	376086	0.866629	2819842	2819842	Deinococcus_deserti_VCD115_complete_genome	Deinococcus-Thermus	69976865	36.5101	7.67184e-292	Y	6.99498e+07	36.4519	6.42119e-291	Y	0.902355	0.936148	0.918746	0	0.919056	100	0.902551	0.936335	0.918722	0	0.919149	100	Y	Y	N	Y	N	Y
65.7	2223878	243327	0.901375	2467205	2467205	Deinococcus geothermalis SM 11300	Deinococcus-Thermus	4.01387e+07	30.3582	1.95809e-202	Y	4.00425e+07	30.0698	1.20334e-198	Y	0.916817	0.955745	0.918743	0	0.920901	100	0.916836	0.957433	0.918699	0	0.921147	100	Y	Y	N	Y	N	Y
47.9	8272157	867606	0.905073	9139763	9139763	Myxococcus_xanthus_DK_1622_complete_genome	Deltaproteobacteria	4.54101e+08	24.6436	4.31461e-134	Y	453714852	24.4784	2.50621e-132	Y	0.918227	0.933111	0.918691	0	0.919203	100	0.918084	0.933421	0.918692	0	0.919148	100	Y	Y	N	Y	N	Y
66	3592119	325642	0.916881	3917761	3917761	Geobacter_lovleyi_SZ_complete_genome	Deltaproteobacteria	7.70998e+07	21.5524	5.02862e-103	Y	7.67997e+07	21.0667	1.60825e-98	Y	0.918665	0.940729	0.918696	45	0.920235	100	0.918468	0.942171	0.918743	14	0.920454	100	Y	Y	N	Y	N	Y
57	4011443	603707	0.86919	4615150	4615150	Geobacter bemidjiensis Bem	Deltaproteobacteria	162914490	24.4588	4.0517e-132	Y	162651979	24.1868	3.06056e-129	Y	0.940719	0.969901	0.918818	100	0.920916	100	0.940425	0.968788	0.918694	100	0.920732	100	Y	Y	Y	Y	Y	Y
38.2	3476331	467836	0.881385	3944167	3944167	Desulfococcus oleovorans Hxd3	Deltaproteobacteria	1.10979e+08	25.6107	1.15965e-144	Y	110899676	25.5025	1.84907e-143	Y	0.928263	0.952708	0.918772	100	0.920348	100	0.928245	0.952864	0.918686	100	0.920517	100	Y	Y	Y	Y	Y	Y
38.9	5670505	846568	0.8701	6517073	6517073	Desulfatibacillum alkenivorans AK 01	Deltaproteobacteria	318781423	26.5984	7.08687e-156	Y	318742779	26.5744	1.34027e-155	Y	0.933613	0.958628	0.918665	100	0.919745	100	0.933941	0.95335	0.918726	100	0.91999	100	Y	Y	Y	Y	Y	Y
50.9	4535482	493847	0.901807	5029329	5029329	Anaeromyxobacter dehalogenans 2CP-1	Deltaproteobacteria	1.44286e+08	20.7598	9.9888e-96	Y	1.4341e+08	19.856	9.7809e-88	Y	0.905334	0.91996	0.918712	0	0.919305	85	0.90501	0.920725	0.918738	0	0.919502	94	Y	Y	N	N	N	N	y	Y	Y	Y
34.8	2325430	236847	0.907564	2562277	2562277	Sulfurovum_sp_NBC37-1_genomic_DNA_complete_genome	Epsilonproteobacteria	32301223	5.72648	1.02536e-08	Y	3.24443e+07	6.14378	8.05826e-10	Y	0.945974	0.955809	0.918642	100	0.922414	100	0.946653	0.956501	0.918723	100	0.922569	100	Y	Y	Y	Y	Y	Y
53.7	2041081	160480	0.927106	2201561	2201561	Sulfurimonas_denitrificans_DSM_1251_complete_genome	Epsilonproteobacteria	1.9161e+07	6.14094	8.2033e-10	Y	19038332	5.64042	1.6964e-08	Y	0.943997	0.954342	0.918761	100	0.922561	100	0.943008	0.954232	0.9186	100	0.923002	100	Y	Y	Y	Y	Y	Y
61.9	1777106	100825	0.949046	1877931	1877931	Nitratiruptor_sp_SB155-2_genomic_DNA_complete_genome	Epsilonproteobacteria	1.03334e+07	5.18589	2.14989e-07	Y	1.03569e+07	5.32641	1.00173e-07	Y	0.95019	0.964262	0.918618	100	0.924398	100	0.950322	0.96317	0.91862	100	0.924221	100	Y	Y	Y	Y	Y	Y
47	1490269	177598	0.893518	1667867	1667867	Heliobacter pylori	Epsilonproteobacteria	16160223	7.08528	1.38763e-12	Y	1.609e+07	6.71885	1.8317e-11	Y	0.939737	0.950956	0.918505	100	0.921446	100	0.940547	0.952526	0.918793	100	0.921935	100	Y	Y	Y	Y	Y	Y
56.5	1391684	162243	0.895592	1553927	1553927	Helicobacter acinonychis str Sheeba	Epsilonproteobacteria	1.37993e+07	7.00277	2.50946e-12	Y	1.38846e+07	7.50137	6.31537e-14	Y	0.939266	0.952079	0.918728	100	0.921944	100	0.939399	0.950586	0.918552	100	0.921561	100	Y	Y	Y	Y	Y	Y
62.2	1421970	103490	0.932158	1525460	1525460	Campylobacter_lari_RM2100_complete_genome	Epsilonproteobacteria	9063228	8.6089	7.37621e-18	Y	9.09918e+06	8.87189	7.19143e-19	Y	0.937423	0.956371	0.918676	100	0.922688	100	0.937798	0.956218	0.918643	100	0.922499	100	Y	Y	Y	Y	Y	Y
54.2	1441201	270072	0.842181	1711273	1711273	Campylobacter_hominis_ATCC_BAA_381_complete_genome	Epsilonproteobacteria	2.39852e+07	3.74671	0.00017917	Y	2.39742e+07	3.7001	0.000215517	Y	0.930769	0.935326	0.918692	100	0.920493	100	0.930661	0.935385	0.918546	100	0.920462	100	Y	Y	Y	Y	Y	Y
58.4	1833614	218393	0.893571	2052007	1884364	Campylobacter concisus 13826	Epsilonproteobacteria	25085145	10.2727	9.35934e-25	Y	25163438	10.5719	4.02205e-26	Y	0.926153	0.941267	0.918601	100	0.92183	100	0.926169	0.941372	0.918742	100	0.921854	100	Y	Y	Y	Y	Y	Y
74.2	2176502	164749	0.929632	2341251	2341251	Arcobacter butzleri RM 4018	Epsilonproteobacteria	2.16692e+07	9.03183	1.68825e-19	Y	21523720	8.4818	2.2174e-17	Y	0.942297	0.960329	0.918684	100	0.923608	100	0.942641	0.959529	0.91866	100	0.924192	100	Y	Y	Y	Y	Y	Y	y	y	y	y
56.9	1577639	160866	0.907469	1738505	1738505	Pyrococcus_horikoshii_OT3_DNA_complete_genome	Euryarchaeota	15176345	6.25332	4.01819e-10	Y	1.52388e+07	6.57906	4.73418e-11	Y	0.951413	0.964012	0.918668	100	0.923043	100	0.952137	0.962966	0.918832	100	0.92296	100	Y	Y	Y	Y	Y	Y
71.2	1412616	133279	0.913785	1545895	1545895	Picrophilus_torridus_DSM_9790_complete_genome	Euryarchaeota	10422184	0.812445	0.416536	N	10495190	1.28136	0.200066	N	0.920693	0.923655	0.918757	100	0.918863	100	0.921134	0.922894	0.918751	100	0.919026	100	Y	Y	Y	Y	Y	Y
41.5	1473041	247007	0.856395	1720048	1720048	Methanococcus_vannielii_SB_complete_genome	Euryarchaeota	2.14288e+07	0.812351	0.41659	N	2.14334e+07	0.832845	0.404932	N	0.928043	0.929304	0.918842	100	0.920514	100	0.916577	0.956044	0.918709	100	0.921502	100	Y	N	Y	Y	Y	Y
39	1671340	181820	0.901887	1853160	2191517	Methanobrevibacter smithii ATCC 35061	Euryarchaeota	1.9089e+07	10.3568	3.89837e-25	Y	1.92363e+07	11.0366	2.5442e-28	Y	0.925644	0.944265	0.918794	100	0.92215	100	0.925092	0.940692	0.918794	100	0.921928	100	Y	Y	Y	Y	Y	Y
38	416186	109757	0.791314	525943	525943	Halorubrum lacusprofundi ATCC 49239 chromosome 2	Euryarchaeota	3037300	3.4159	0.00063582	Y	3011300	2.8338	0.0046	Y	0.913166	0.917859	0.918545	0	0.91852	29	0.912905	0.918252	0.918895	0	0.918761	39	Y	Y	N	N	N	N
40	2367590	367705	0.86557	2735295	2735295	Halorubrum lacusprofundi ATCC 49239	Euryarchaeota	5.49206e+07	10.3987	2.51361e-25	Y	5.49297e+07	10.4191	2.02766e-25	Y	0.907388	0.916011	0.918696	0	0.919851	0	0.907399	0.916528	0.918762	0	0.919965	0	Y	Y	N	N	N	N
40	2394671	737823	0.764461	3132494	3132494	Haloquadratum walsbyi DSM 16790	Euryarchaeota	126399355	15.9643	2.26654e-57	Y	126114881	15.5454	1.70994e-54	Y	0.905476	0.915516	0.918704	0	0.918795	0	0.905287	0.915675	0.918724	0	0.918849	0	Y	Y	N	N	N	N
34	1823282	177680	0.911203	2000962	2000962	Halobacterium salinarium	Euryarchaeota	2.08538e+07	13.2807	2.99745e-40	Y	20748635	12.8279	1.14444e-37	Y	0.890625	0.904607	0.918671	0	0.917706	0	0.890681	0.905067	0.918677	0	0.91774	0	Y	Y	N	N	N	N
35	220584	67466	0.765784	288050	288050	Haloarcula marismortui ATCC 43049 Chromosome 2	Euryarchaeota	991140	1.0895	0.2759	N	985076	0.7686	0.4421	N	0.908393	0.911936	0.918596	0	0.918847	0	0.90794	0.911613	0.918829	0	0.919179	0	Y	Y	N	N	N	N
35	2700822	430902	0.862407	3131724	3131724	Haloarcula marismortui ATCC 43049	Euryarchaeota	7.60894e+07	15.6317	4.43119e-55	Y	76179588	15.7954	3.34851e-56	Y	0.903983	0.916181	0.918709	0	0.916181	1	0.90398	0.916085	0.918772	0	0.918849	0	Y	Y	N	N	N	N
35	2456708	466209	0.840499	2922917	1308759	Candidatus methanosphaerula palustris E1 9c	Euryarchaeota	76833654	16.4688	6.15071e-61	N	76623383	16.0707	4.09648e-58	N	0.931679	0.947095	0.918662	100	0.919878	100	0.931927	0.947292	0.91873	100	0.91991	100	Y	Y	Y	Y	Y	Y
29.6	2185840	357103	0.859571	2542943	2922917	Candidatus Methanoregula boonei 6A8	Euryarchaeota	5.44298e+07	22.1892	4.36826e-109	Y	54271322	21.7996	2.33876e-105	Y	0.93754	0.963201	0.918695	100	0.920869	100	0.937223	0.963961	0.918696	100	0.921269	100	Y	Y	Y	Y	Y	Y
46.2	1978825	199575	0.908385	2178400	2178400	Archaeoglobus fulgidus DSM 4304	Euryarchaeota	2.10026e+07	-2.7156	0.00661566	Y	20960010	-2.87459	0.00404559	Y	0.95659	0.951439	0.918744	100	0.922013	100	0.955735	0.951003	0.91871	100	0.922051	100	N	N	Y	Y	Y	Y	N	N	N	N
31	1886444	334871	0.849247	2221315	2221315	Strep pneu	Firmicutes	44119150	20.2815	1.87487e-91	Y	4.36109e+07	18.7951	8.27833e-79	Y	0.937384	0.964291	0.918689	100	0.920837	100	0.937453	0.966548	0.918655	100	0.921508	100	Y	Y	Y	Y	Y	Y
31.3	6321997	862933	0.879897	7184930	7184930	Paenibacillus_sp_JDR-2_complete_genome	Firmicutes	385577823	41.823	0	Y	3.85891e+08	41.9964	0	Y	0.927065	0.957554	0.918682	100	0.920151	100	0.926253	0.956934	0.918662	100	0.919843	100	Y	Y	Y	Y	Y	Y
68.4	3007218	537558	0.848352	3544776	3544776	Geobacillus kaustophilus HTA426	Firmicutes	1.25061e+08	43.1189	0	Y	125623219	43.9319	0	Y	0.936385	0.986625	0.918731	100	0.921424	100	0.936233	0.986501	0.918752	100	0.921412	100	Y	Y	Y	Y	Y	Y
71.5	1629900	167677	0.906721	1797577	1797577	Finegoldia magna ATCC 29328	Firmicutes	1.74695e+07	11.8921	1.30078e-32	Y	1.74958e+07	12.0219	2.72681e-33	Y	0.927375	0.945717	0.918355	100	0.920468	100	0.927756	0.947182	0.918555	100	0.920879	100	Y	Y	Y	Y	Y	Y
45.5	2767279	450752	0.859929	3218031	3218031	Enterococcus faecalis v583	Firmicutes	9.47068e+07	38.3686	0	Y	94603441	38.1898	0	Y	0.931844	0.978611	0.918591	100	0.921384	100	0.931986	0.979226	0.918706	100	0.921743	100	Y	Y	Y	Y	Y	Y
68.9	1312642	112270	0.921209	1424912	1424912	Coprothermobacter proteolyticus DSM 5265	Firmicutes	9.15766e+06	8.80196	1.34452e-18	Y	9.13336e+06	8.61817	6.80335e-18	Y	0.935009	0.953575	0.918851	100	0.922684	100	0.934168	0.952076	0.918512	100	0.922738	100	Y	Y	Y	Y	Y	Y
31.6	3133052	730398	0.810947	3863450	5373180	Clostridium botulinum A str ATCC 19397	Firmicutes	141780814	0.825802	0.408916	N	143016613	2.26567	0.0234714	Y	0.937718	0.938863	0.91817	100	0.919389	100	0.939453	0.939665	0.918603	100	0.919515	100	Y	Y	Y	Y	Y	Y
39.7	3376656	564224	0.856828	3940880	3863450	Clostridium acetobutylicum	Firmicutes	114329421	3.99081	6.5848e-05	Y	114186357	3.80994	0.000139001	Y	0.935814	0.938524	0.918471	100	0.919704	100	0.935298	0.939526	0.91848	100	0.919482	100	Y	Y	Y	Y	Y	Y
50.7	654509	225450	0.743795	879959	2401520	Candidatus_Phytoplasma australiense	Firmicutes	1.15027e+07	15.2392	1.94254e-52	Y	1.1371e+07	13.9735	2.26144e-44	Y	0.949865	0.974043	0.918552	100	0.920451	100	0.950354	0.977797	0.91874	100	0.920985	100	Y	Y	Y	Y	Y	Y
34.2	5489657	806779	0.871867	6296436	6296436	Brevibacillus_brevis_NBRC_100599_DNA_complete_genome	Firmicutes	3.1787e+08	41.9228	0	Y	317774203	41.8601	0	Y	0.938738	0.974567	0.918666	100	0.920725	100	0.938707	0.974736	0.918745	100	0.920617	100	Y	Y	Y	Y	Y	Y
56	4212748	1014545	0.805914	5227293	5227293	Bacillus anthracis ames	Firmicutes	316553254	37.6701	0	Y	318561059	39.1416	0	Y	0.939043	0.971087	0.918681	100	0.920085	100	0.940112	0.97072	0.918797	100	0.920123	100	Y	Y	Y	Y	Y	Y	y	y	y	y
56	519589	186980	0.735369	706569	706569	aywb	Firmicutes	7.10803e+06	6.68962	2.23743e-11	Y	7141015	7.12595	1.03363e-12	Y	0.948614	0.964059	0.918554	100	0.920127	100	0.948611	0.962628	0.918772	100	0.920136	100	Y	Y	Y	Y	Y	Y	y	y	y	y
50.3	2494492	425226	0.854361	2919718	2919718	Anaerocellum thermophilum DSM 6725	Firmicutes	71260267	18.0858	4.12532e-73	Y	7.05983e+07	16.7827	3.26825e-63	Y	0.944067	0.966025	0.918557	100	0.921136	100	0.94286	0.96823	0.918484	100	0.921632	100	Y	Y	Y	Y	Y	Y	Y	Y	Y	Y
	4082836	846730	0.828234	4929566	4929566	Alkaliphilus metalliredigens QYMF	Firmicutes	2.27665e+08	15.9187	4.69913e-57	Y	2.28026e+08	16.2223	3.5107e-59	Y	0.936858	0.950574	0.918516	100	0.920153	100	0.936871	0.949636	0.918492	100	0.919982	100	Y	Y	Y	Y	Y	Y	Y	Y	Y	Y
42	1355267	141725	0.905327	1496992	1496992	Acholeplams laidlawii	Firmicutes	13128652	16.2971	1.03507e-59	Y	13114315	16.2045	4.69018e-59	Y	0.913681	0.939472	0.918598	0	0.918645	100	0.913663	0.938134	0.918621	0	0.91992	100	Y	Y	N	Y	N	Y	Y	Y	Y	Y
37.1	2058043	407567	0.834699	2465610	2465610	Leptotrichia_buccalis_DSM_1135_complete_genome	Fusobacteria	56586164	15.2963	8.08942e-53	Y	56682458	15.5283	2.23207e-54	Y	0.939601	0.958119	0.918174	100	0.921613	100	0.941524	0.961294	0.918383	100	0.922052	100	Y	Y	Y	Y	Y	Y
34.1	1932224	242276	0.888583	2174500	2174500	Fusobacterium nucleatum subsp	Fusobacterium	2.90332e+07	9.2716	1.8337e-20	Y	28727645	8.2225	1.99302e-16	Y	0.948046	0.961816	0.918304	100	0.922335	100	0.949685	0.965842	0.918538	100	0.92355	100	Y	Y	Y	Y	Y	Y
36	3913968	775473	0.834634	4689441	4689441	Yersinia_pseudotuberculosis_YPIII	Gammaproteobacteria	213696265	29.2818	1.76973e-188	Y	2.13658e+08	29.247	4.90608e-188	Y	0.912992	0.931868	0.918726	0	0.919469	100	0.912907	0.93231	0.918745	0	0.919448	100	Y	Y	N	Y	N	Y
61.7	3927101	768518	0.836333	4695619	4695619	Yersinia_pseudotuberculosis_PB1_complete_genome	Gammaproteobacteria	210190345	27.3836	4.30371e-165	Y	2.10967e+08	28.098	1.03691e-173	Y	0.913016	0.932205	0.918721	0	0.919506	100	0.912991	0.931603	0.918745	0	0.919478	100	Y	Y	N	Y	N	Y
45.6	3738424	856641	0.813574	4595065	4595065	Yersinia_pestis_biovar_Microtus_str_91001	Gammaproteobacteria	222261746	22.986	6.43507e-117	Y	2.22893e+08	23.5561	1.08639e-122	Y	0.913889	0.928821	0.918787	0	0.919275	100	0.914124	0.928637	0.91866	0	0.919313	100	Y	Y	N	Y	N	Y
48.3	1431741	243774	0.854508	1675515		Vibrio_splendidus_LGP32_chromosome_2	Gammaproteobacteria	23162000	12.4395	1.5959e-35	Y	23183000	12.5346	4.8267e-36	Y	0.916824	0.931487	0.918756	0	0.919039	100	0.917003	0.931369	0.918793	0	0.919417	100	Y	Y	N	Y	N	Y
50	2838849	460454	0.860439	3299303		Vibrio_splendidus_LGP32_chromosome_1	Gammaproteobacteria	88042000	20.1728	1.6968e-90	Y	88193000	20.4243	1.0169e-92	Y	0.916614	0.935116	0.918758	0	0.91932	100	0.916669	0.934928	0.918765	0	0.919456	100	Y	Y	N	Y	N	Y
31.2	1901116	302902	0.862568	2204018		Vibrio_harveyi_ATCCBAA-1116_chromosome_II_complete_sequence	Gammaproteobacteria	39533000	18.9167	8.3105e-80	Y	39522000	18.881	1.6338e-79	Y	0.919696	0.941133	0.918818	100	0.919757	100	0.919591	0.940652	0.918731	100	0.919399	100	Y	Y	Y	Y	Y	Y
50.1	3214246	551105	0.853638	3765351		Vibrio_harveyi_ATCCBAA-1116_chromosome_I_complete_sequence	Gammaproteobacteria	123823531	26.9177	1.3622e-159	Y	124060000	27.2396	2.208e-163	Y	0.918003	0.940829	0.918735	0	0.919348	100	0.91831	0.940509	0.918766	3	0.919513	100	Y	Y	N	Y	N	Y
39	903040	183744	0.830929	1086784		Vibrio_cholerae_MJ-1236_chromosome_2_complete_sequence	Gammaproteobacteria	11695000	13.974	2.2477e-44	Y	11695000	13.974	2.2477e-44	Y	0.915462	0.93741	0.918734	0	0.919602	100	0.915948	0.936294	0.91866	0	0.919505	100	Y	Y	N	Y	N	Y
39	2745830	403754	0.871807	3149584		Vibrio_cholerae_MJ-1236_chromosome_1_complete_sequence	Gammaproteobacteria	78587979	27.8342	1.6752e-170	Y	78655000	27.9588	5.1517e-172	Y	0.915111	0.94208	0.918713	0	0.91953	100	0.914871	0.941307	0.918711	0	0.919497	100	Y	Y	N	Y	N	Y
63.3	3538078	1021520	0.775963	4559598	4559598	Psychromonas_ingrahamii_37_complete_genome	Gammaproteobacteria	2.61553e+08	24.4673	3.29374e-132	Y	2.61836e+08	24.7082	8.72001e-135	Y	0.921609	0.936921	0.91872	100	0.919106	100	0.921843	0.937015	0.918741	100	0.919203	100	Y	Y	Y	Y	Y	Y
42.2	2544709	515167	0.831638	3059876	3059876	Psychrobacter_cryohalolentis_K5_complete_genome	Gammaproteobacteria	9.41571e+07	26.5502	2.55567e-155	Y	94191603	26.6099	5.21894e-156	Y	0.903118	0.922283	0.918704	0	0.919075	100	0.903361	0.922019	0.918759	0	0.919036	100	Y	Y	N	Y	N	Y
40.1	6272532	802361	0.88659	7074893	7074893	Pseudomonas_fluorescens_Pf-5_complete_genome	Gammaproteobacteria	369248369	49.6023	0	Y	3.70053e+08	50.0696	0	Y	0.897757	0.925948	0.918722	0	0.918837	100	0.897732	0.925968	0.918697	0	0.918953	100	Y	Y	N	Y	N	Y
57.2	554629	80699	0.872981	635328		Pseudoalteromonas_haloplanktis_str_TAC125_chromosome_II_complete_sequence	Gammaproteobacteria	2986800	8.7671	1.8325e-18	Y	2989039	8.8142	1.2057e-18	Y	0.9063	0.922272	0.918819	0	0.919258	96	0.906779	0.922815	0.918606	0	0.918841	99	Y	Y	N	N	N	N
49.6	2799611	415333	0.870812	3214944		Pseudoalteromonas_haloplanktis_str_TAC125_chromosome_I_complete_sequence	Gammaproteobacteria	78362000	20.7887	5.4818e-96	Y	78438000	20.9255	3.1405e-97	Y	0.906867	0.923374	0.918721	0	0.918795	100	0.906883	0.923704	0.918758	0	0.918872	100	Y	Y	N	Y	N	Y
41.9	4954310	686929	0.878231	5641239	5641239	Klebsiella pneumoniae 342	Gammaproteobacteria	2.47267e+08	42.311	0	Y	2.48084e+08	42.9571	0	Y	0.912438	0.943418	0.918679	0	0.92016	100	0.912438	0.943418	0.918735	0	0.920236	100	Y	Y	N	Y	N	Y
64.4	2612597	226721	0.920149	2839318	2839318	Idiomarina loihiensis L2TR	Gammaproteobacteria	3.91457e+07	18.5988	3.28501e-77	Y	39205895	18.7595	1.61894e-78	Y	0.912053	0.933554	0.918561	0	0.91972	100	0.911949	0.934411	0.918842	0	0.920426	100	Y	Y	N	Y	N	Y
64.4	6340587	874680	0.878774	7215267	7215267	Hahella_chejuensis_KCTC_2396_complete_genome	Gammaproteobacteria	3.70114e+08	29.8979	2.09604e-196	Y	3.69488e+08	29.555	5.65964e-192	Y	0.91959	0.938458	0.918717	100	0.91986	100	0.919752	0.939445	0.918722	100	0.919722	100	Y	Y	Y	Y	Y	Y
63	1661359	253131	0.867781	1914490	1914490	Haemophilus influenzae 86-028NP	Gammaproteobacteria	29559039	20.5829	3.90572e-94	Y	2.93481e+07	19.7685	5.55975e-87	Y	0.925894	0.953065	0.918692	100	0.920591	100	0.925622	0.954903	0.918703	100	0.920389	100	Y	Y	Y	Y	Y	Y
64	1707182	202849	0.893798	1910031	1910031	Francisella tularensis subsp novicida U112	Gammaproteobacteria	21254433	8.03881	9.07135e-16	Y	21262813	8.07451	6.77475e-16	Y	0.914439	0.923357	0.918729	0	0.920571	100	0.914916	0.923543	0.918655	0	0.920309	100	Y	Y	N	Y	N	Y
69.1	3961569	557143	0.876703	4518712	4518712	Enterobacter sp 638	Gammaproteobacteria	1.6482e+08	42.7279	0	Y	165188136	43.1322	0	Y	0.909977	0.94773	0.918716	0	0.919653	100	0.910262	0.948037	0.918719	0	0.919169	100	Y	Y	N	Y	N	Y
69.1	3830808	537565	0.876942	4368373	4368373	Enterobacter sakazakii ATCC BAA 894	Gammaproteobacteria	1.55352e+08	43.8358	0	Y	1.55984e+08	44.5656	0	Y	0.907725	0.942911	0.918727	0	0.919817	100	0.907842	0.942994	0.918701	0	0.919909	100	Y	Y	N	Y	N	Y
62.3	4599310	632118	0.879169	5231428	5231428	E coli	Gammaproteobacteria	196469696	27.65	2.79367e-168	Y	196835456	27.9749	3.28694e-172	Y	0.915207	0.93612	0.918733	0	0.919741	100	0.915336	0.936043	0.918747	0	0.919704	100	Y	Y	N	Y	N	Y
67	1554149	454721	0.773643	2008870	2008870	Coxiella burnetii CbuG_Q212	Gammaproteobacteria	51329492	16.4478	8.69241e-61	Y	51365361	16.5521	1.54565e-61	Y	0.933519	0.951133	0.918682	100	0.919549	100	0.934128	0.951348	0.918766	100	0.919609	100	Y	Y	Y	Y	Y	Y
59.6	4537833	835347	0.844534	5373180	3416911	Colwellia psychrerythraea 34H	Gammaproteobacteria	250510377	20.0332	2.82621e-89	Y	250374607	19.929	2.27935e-88	Y	0.917402	0.929355	0.918708	0	0.919315	100	0.917397	0.929714	0.918754	0	0.919267	100	Y	Y	N	Y	N	Y
55.3	4263155	457307	0.903122	4720462	3258645	Citrobacter koseri ATCC BAA 895	Gammaproteobacteria	1.34901e+08	30.7942	3.13724e-208	Y	134768423	30.6425	3.32237e-206	Y	0.913901	0.939695	0.918645	0	0.919846	100	0.913915	0.940699	0.918791	0	0.919878	100	Y	Y	N	Y	N	Y
60.7	3305988	390661	0.89432	3696649	4720462	Chromohalobacter salexigens DMS 3043	Gammaproteobacteria	91293165	30.282	1.97891e-201	Y	91286213	30.271	2.76372e-201	Y	0.899	0.923018	0.918766	0	0.919324	100	0.899087	0.923323	0.918651	0	0.9192	100	Y	Y	N	Y	N	Y
60.4	4134004	442569	0.903297	4576573	1072950	Cellvibrio japonicus Ueda 107	Gammaproteobacteria	123990380	27.217	4.0879e-163	Y	1.24061e+08	27.3019	4.02847e-164	Y	0.90894	0.931527	0.918667	0	0.919206	100	0.908946	0.930906	0.918662	0	0.919146	100	Y	Y	N	Y	N	Y
71.1	869821	152333	0.850969	1022154	1022154	Candidatus Vesicomyosocius okutanii HA	Gammaproteobacteria	8405973	5.85464	4.78048e-09	Y	8.38309e+06	5.63922	1.70826e-08	Y	0.916566	0.924685	0.918807	0	0.919241	100	0.916434	0.926638	0.918566	0	0.91939	100	Y	Y	N	Y	N	Y
60.2	918718	242064	0.791465	1160782	1160782	Candidatus Ruthia magnifica str Cm	Gammaproteobacteria	1.55183e+07	10.0418	9.98105e-24	Y	1.55446e+07	10.2212	1.5929e-24	Y	0.912947	0.924568	0.918718	0	0.919236	100	0.913189	0.925114	0.918622	0	0.919099	100	Y	Y	N	Y	N	Y
35.7	551195	90927	0.858396	642122	3556545	Buchnera_aphidicola str 5A	Gammaproteobacteria	3.06701e+06	2.8715	0.00408525	Y	3.05336e+06	2.60787	0.00911067	Y	0.946504	0.951606	0.91877	100	0.919403	100	0.945305	0.951227	0.918451	100	0.91965	100	Y	Y	Y	Y	Y	Y	y	y	y	y
39.7	356590	59790	0.856405	416380	642122	Buchnera aphidicola str Cc	Gammaproteobacteria	1160338	-3.02943	0.00245016	Y	1.15877e+06	-3.08719	0.00202058	Y	0.953474	0.942807	0.918731	100	0.918463	100	0.95155	0.943149	0.918688	100	0.918724	100	N	N	Y	Y	Y	Y
35.4	586372	99822	0.854528	686194	686194	Baumannia_cicadellinicola_str Hc	Gammaproteobacteria	3625489	3.48094	0.000499664	Y	3.59612e+06	2.9732	0.00294714	Y	0.917712	0.922312	0.918693	3	0.91861	100	0.9174	0.923068	0.918722	2	0.918785	100	Y	Y	N	Y	N	Y	N	N	N	N
32.8	2728378	391765	0.87444	3120143	3120143	Alcanivorax borkumensis SK2	Gammaproteobacteria	73861834	24.1967	2.41047e-129	Y	74012101	24.4818	2.31059e-132	Y	0.912877	0.935268	0.918735	0	0.919258	100	0.91299	0.935329	0.918716	0	0.919344	100	Y	Y	N	Y	N	Y	Y	Y	Y	Y
32	1963473	311009	0.863262	2274482	2274482	Actinobacillus_pleuropneumoniae_L20_serotype_5b_complete	Gammaproteobacteria	45383619	29.4389	1.74406e-190	Y	4.56016e+07	30.0796	8.96162e-199	Y	0.917002	0.951753	0.91869	0	0.919865	100	0.917366	0.951884	0.918695	0	0.919928	100	Y	Y	N	Y	N	Y
34.5	3458600	591913	0.853867	4050513	4050513	Acinetobacter baumannii	Gammaproteobacteria	148853052	34.8571	3.32614e-266	Y	1.48566e+08	34.5116	5.36713e-261	Y	0.914368	0.941176	0.918738	0	0.919559	100	0.914091	0.941381	0.918724	0	0.91954	100	Y	Y	N	Y	N	Y	y	y	y	y
43.9	2666104	316293	0.893947	2982397	2982397	Acidithiobacillus ferrooxidans	Gammaproteobacteria	5.26346e+07	11.9784	4.61127e-33	Y	52511071	11.7085	1.15286e-31	Y	0.917523	0.929054	0.918755	0	0.919787	100	0.917483	0.929208	0.918668	0	0.919639	100	Y	Y	N	Y	N	Y	y	y	y	y
55.5	451071	39814	0.918893	490885	490885	Nanoarchaeum_equitans_Kin4-M_complete_genome	Nanoarchaeota	940296	-1.35046	0.176869	Y	955398	-0.793125	0.427705	Y	0.945055	0.943583	0.918775	100	0.920301	100	0.94545	0.939834	0.918972	100	0.91982	100	N	N	Y	Y	Y	Y
59.9	1424494	166263	0.895482	1590757	2542943	Candidatus Korarchaeum cryptofilum OPF8	Other Archaea	13152019	-0.376509	0.706539	N	1.31217e+07	-0.547409	0.584098	N	0.956979	0.955562	0.918855	100	0.920555	100	0.955489	0.955312	0.918697	100	0.920197	100	N	N	Y	Y	Y	Y
30.8	1046828	92629	0.918708	1139457	1139457	Treponema_pallidum_subsp_pallidum_SS14_complete_genome	Spirochaetes	6006470	7.61497	2.6376e-14	Y	6.01143e+06	7.66665	1.76547e-14	Y	0.940155	0.958276	0.91874	100	0.922281	100	0.940594	0.958288	0.918744	100	0.922388	100	Y	Y	Y	Y	Y	Y
53.9	2601169	242032	0.914873	2843201	2843201	Treponema_denticola_ATCC_35405_complete_genome	Spirochaetes	3.32551e+07	-2.97154	0.00296309	Y	33169913	-3.19225	0.00141171	Y	0.956879	0.952912	0.918615	100	0.921222	100	0.957036	0.953504	0.918718	100	0.921622	100	N	N	Y	Y	Y	Y
38.7	3373699	958542	0.778742	4332241	4332241	Leptospira_interrogans_serovar_lai_str_56601_chromosome_I_complete_sequence	Spirochaetes	1.73664e+08	1.08847e+06	8.31217e-217	Y	1.72937e+08	-32.1015	4.20443e-226	Y	0.960249	0.937041	0.918779	100	0.919238	100	0.959764	0.937107	0.918641	100	0.919357	100	N	N	Y	Y	Y	Y
46.9	277234	82138	0.77144	359372	359372	Leptospira_interrogans_serovar_lai_str_56601_chromosome_2_complete_sequence	Spirochaetes	1259900	-8.2505	1.5773e-16	Y	1268532	-7.9213	2.351e-15	Y	0.962402	0.941297	0.918782	100	0.919109	100	0.961556	0.940097	0.91868	100	0.919394	100	N	N	Y	Y	Y	Y
46.1	3197028	1080157	0.747461	4277185	4277185	Leptospira_interrogans_serovar_Copenhageni_str_Fiocruz_L1-130_chromosome_I	Spirochaetes	1.96559e+08	-31.0356	1.78277e-211	Y	1.96107e+08	-31.443	5.23459e-217	Y	0.960555	0.938096	0.918714	100	0.919026	100	0.960321	0.938429	0.918711	100	0.919156	100	N	N	Y	Y	Y	Y
46.2	260639	89542	0.744298	350181	350181	Leptospira_interrogans_serovar_Copenhageni_str_Fiocruz_L1-130_chromosome_2	Spirochaetes	1331900	-9.0154	1.9607e-19	Y	1335200	-8.8901	6.1028e-19	Y	0.961071	0.940279	0.91873	100	0.918823	100	0.961304	0.940369	0.918813	100	0.919042	100	N	N	Y	Y	Y	Y
69.4	223901	75861	0.746929	299762		Leptospira_borgpetersenii_serovar_Hardjobovis_JB197_chromosome_2_complete_sequence	Spirochaetes	1088500	-2.3169	0.0205	Y	1063526	-3.5314	0.00041344	Y	0.965209	0.953546	0.919044	100	0.919365	100	0.960472	0.955881	0.918393	100	0.919442	100	N	N	Y	Y	Y	Y
37.9	2601963	974510	0.727522	3576473		Leptospira_borgpetersenii_serovar_Hardjobovis_JB197_chromosome_1_complete_sequence	Spirochaetes	163842214	-11.9897	4.0236e-33	Y	163780000	-12.0622	1.6722e-33	Y	0.962775	0.953562	0.918664	0	0.91912	100	0.963664	0.954518	0.91878	0	0.919144	100	N	N	N	Y	N	Y
52.8	3343226	256451	0.928757	3599677	3599677	Leptospira_biflexa_serovar_Patoc_strain_Patoc_1_Paris_chromosome_I	Spirochaetes	4.98202e+07	7.24154	4.4362e-13	Y	4.97876e+07	7.1771	7.12063e-13	Y	0.955776	0.968342	0.9187	100	0.92162	100	0.95587	0.968071	0.91872	100	0.922182	100	Y	Y	Y	Y	Y	Y
67	260280	17375	0.937422	277655	277655	Leptospira_biflexa_serovar_Patoc_strain_Patoc_1_Paris_chromosome_2	Spirochaetes	284566	4.3551	1.3303e-05	Y	285012	4.3988	1.0887e-05	Y	0.955129	0.982527	0.918802	100	0.924835	100	0.955427	0.979556	0.918736	100	0.924324	100	Y	Y	Y	Y	Y	Y
67	2603208	397486	0.867535	3000694	3000694	Brachyspira_hyodysenteriae_WA1_complete_genome	Spirochaetes	59846201	0.437054	0.662072	N	59824527	0.39444	0.693256	N	0.94002	0.939501	0.91874	100	0.919866	100	0.939589	0.940105	0.918606	100	0.920014	100	N	Y	Y	Y	Y	Y
65.2	859597	57733	0.937064	917330	917330	Borrelia_turicatae_91E135_complete_genome	Spirochaetes	2494402	-2.46883	0.0135555	Y	2.47054e+06	-2.85631	0.00428593	Y	0.940567	0.934494	0.918617	100	0.919637	100	0.941367	0.935625	0.918719	100	0.920371	100	N	N	Y	Y	Y	Y
47.3	842409	88572	0.904862	930981	930981	Borrelia_recurrentis_A1_complete_genome	Spirochaetes	3845515	-3.60487	0.000312313	Y	3861177	-3.39893	0.000676499	Y	0.939963	0.935225	0.918584	100	0.919274	100	0.940744	0.943348	0.918653	100	0.919573	100	N	Y	Y	Y	Y	Y
47.3	859777	62530	0.932203	922307	922307	Borrelia_hermsii_DAH_complete_genome	Spirochaetes	2.75118e+06	-2.03868	0.0414824	Y	2.72782e+06	-2.40215	0.0162989	Y	0.94061	0.936104	0.918615	100	0.91957	100	0.941232	0.936723	0.918814	100	0.920667	100	N	N	Y	Y	Y	Y
45.4	866392	65282	0.92993	931674	931674	Borrelia_duttonii_Ly_complete_genome	Spirochaetes	3006501	-0.460813	0.644932	N	2.94222e+06	-1.43156	0.15227	N	0.939488	0.936269	0.918683	100	0.919256	100	0.939896	0.943385	0.918679	100	0.920402	100	N	Y	Y	Y	Y	Y
45.4	845146	60248	0.933457	905394	905394	Borrelia_afzelii_PKo_complete_genome	Spirochaetes	2559614	-2.67352	0.00750606	Y	2491782	-3.76836	0.000164321	Y	0.946916	0.938031	0.91862	100	0.919592	100	0.947832	0.941118	0.918759	100	0.920209	100	N	N	Y	Y	Y	Y
43.9	849408	61316	0.932673	910724	910724	Borrelia burgdorferi B31	Spirochaetes	2677970	-1.80756	0.0706753	N	2652835	-2.20739	0.0272871	Y	0.947316	0.941473	0.918659	100	0.919914	100	0.948276	0.942821	0.918735	100	0.92002	100	N	N	Y	Y	Y	Y	y	y	y	N
43.9	1766730	110963	0.940905	1877693	1877693	Thermotoga_SP_RQ2_complete_genome	Thermotogae	11114028	4.01033	6.06346e-05	Y	1.11047e+07	3.95692	7.59209e-05	Y	0.970002	0.981984	0.918568	100	0.925013	100	0.971134	0.9863	0.918776	100	0.926985	100	Y	Y	Y	Y	Y	Y
35.2	1718690	104821	0.942517	1823511	1823511	Thermotoga_petrophila_RKU-1_complete_genome	Thermotogae	10253577	4.22179	2.42365e-05	Y	1.03186e+07	4.61454	3.93976e-06	Y	0.969927	0.987097	0.918579	100	0.925906	100	0.97139	0.985301	0.918729	100	0.926996	100	Y	Y	Y	Y	Y	Y
72.5	1800491	84071	0.95539	1884562	1884562	Thermotoga_neapolitana_DSM_4359	Thermotogae	8.84032e+06	6.00495	1.91396e-09	Y	8772629	5.56569	2.61124e-08	Y	0.972157	0.988062	0.918645	100	0.927135	100	0.972578	0.991994	0.918632	100	0.927556	100	Y	Y	Y	Y	Y	Y
47.9	2001539	133803	0.937339	2135342	2135342	Thermotoga_lettingae_TMO	Thermotogae	1.66543e+07	10.8495	2.0041e-27	Y	1.652e+07	10.2345	1.38967e-24	Y	0.941168	0.962582	0.918719	100	0.923431	100	0.940822	0.963043	0.918699	100	0.923749	100	Y	Y	Y	Y	Y	Y
47.5	1813288	203369	0.899155	2016657	2016657	Thermosipho_africanus_TCF52B_complete_genome	Thermotogae	23061214	10.2955	7.38014e-25	Y	23287929	11.2064	3.79127e-29	Y	0.94446	0.962407	0.918445	100	0.922646	100	0.945514	0.963294	0.918642	100	0.922944	100	Y	Y	Y	Y	Y	Y
47.5	1927654	241894	0.888505	2169548	2169548	Petrotoga_mobilis_SJ95_complete_genome	Thermotogae	2.95478e+07	11.432	2.89233e-30	Y	2.8978e+07	9.46915	2.82127e-21	Y	0.950836	0.967245	0.918585	100	0.921326	100	0.95016	0.972195	0.918506	100	0.921552	100	Y	Y	Y	Y	Y	Y
46.6	2024081	278045	0.879223	2302126	2302126	Kosmotoga_olearia_TBF_19.5.1_complete_genome	Thermotogae	3.22263e+07	0.691221	0.489427	N	32166485	0.509194	0.610616	N	0.948257	0.951162	0.918647	100	0.920611	100	0.949069	0.953002	0.918782	100	0.921031	100	Y	Y	Y	Y	Y	Y
46.3	1757108	191833	0.901571	1948941	1948941	Fervidobacterium nodosum Rt17-B1	Thermotogae	21382524	11.5047	1.24914e-30	Y	21342580	11.334	8.9069e-30	Y	0.936759	0.953592	0.918449	100	0.921357	100	0.937248	0.956561	0.91872	100	0.921747	100	Y	Y	Y	Y	Y	Y
